# Supplementary material
Source: PubMed Central journal article supplement (PMC2553831)
Supplement: pbio.0060225.st001.pdf [file pbio.0060225.st001.pdf]

| horm | name     | func         | Affy ID     | AGI ID    | SD | lhy | ler | phyb | col | lux | col |
|------|----------|--------------|-------------|-----------|----|-----|-----|------|-----|-----|-----|
| ABA  | ABA3     | biosynthesis | 246325_At   | At1g16540 |    |     |     |      |     |     |     |
| ABA  | NCED3    | biosynthesis | 257280_At   | At3g14440 | 3  | 19  |     |      |     | 6   | 4   |
| ABA  | ABA1     | biosynthesis | 247025_At   | At5g67030 | 3  | 6   | 3   | 3    | 3   | 5   | 5   |
| ABA  | AAO3     | biosynthesis | 263570_At   | At2g27150 | 4  | 2   |     |      |     |     |     |
| ABA  | NCED2    | biosynthesis | 254668_At   | At4g18350 |    |     |     |      |     |     |     |
| ABA  | NCED9    | biosynthesis | 260797_At   | At1g78390 |    |     |     |      |     |     |     |
| ABA  | NCED5    | biosynthesis | 256190_At   | At1g30100 |    |     |     |      |     |     |     |
| ABA  | AAO2     | biosynthesis | 246330_At   | At3g43600 | 5  | 6   | 6   | 6    | 5   | 8   | 8   |
| ABA  | NCED6    | biosynthesis | 257242_At   | At3g24220 | 8  |     |     |      |     |     |     |
| ABA  | ABA2     | biosynthesis | 259669_At   | At1g52340 | 23 | 7   |     | 4    |     | 6   | 22  |
| ABA  | CYP707A1 | catabolism   | 254562_At   | At4g19230 | 0  |     |     |      |     | 5   | 6   |
| ABA  | CYP707A4 | catabolism   | 257035_At   | At3g19270 | 4  |     |     |      |     |     |     |
| ABA  | CYP707A2 | catabolism   | 266778_At   | At2g29090 | 5  |     |     |      |     | 6   | 7   |
| ABA  | CYP707A3 | catabolism   | 248964_At   | At5g45340 | 23 |     |     |      |     |     |     |
| ABA  | GUN5     | receptor     | 250243_at   | At5g13630 | 2  | 7   | 3   | 1    | 2   | 5   | 4   |
| ABA  | RPK1     | receptor     | 260345_At   | At1g69270 | 18 | 20  | 19  | 20   | 17  | 20  | 19  |
| ABA  | ABI4     | signaling    | 263377_At   | At2g40220 |    |     |     |      |     |     |     |
| ABA  | ABI3     | signaling    | 256898_At   | At3g24650 |    |     |     |      |     |     |     |
| ABA  | ABI2     | signaling    | 247957_At   | At5g57050 | 5  | 3   |     | 4    |     | 7   | 7   |
| ABA  | ABI1     | signaling    | 253994_At   | At4g26080 | 5  | 0   | 1   | 3    |     | 7   | 9   |
| ABA  | ANP2     | signaling    | 256351_At   | At1g54960 |    |     |     |      |     |     |     |
| ABA  | ABI5     | signaling    | 263907_At   | At2g36270 | 7  | 21  |     |      |     |     |     |
| ABA  | ARAC1    | signaling    | 264593_At   | At2g17800 |    | 6   | 6   |      | 7   |     |     |
| ABA  | ANP1     | signaling    | 264623_At   | At1g09000 |    |     |     |      |     |     |     |
| ABA  | SAD1     | signaling    | 248678_At   | At5g48870 | 14 | 10  |     | 11   |     |     | 20  |
| ABA  | ROP10    | signaling    | 252375_At   | At3g48040 | 23 | 17  | 23  |      | 18  | 18  | 17  |
| ACC  | ACS8     | biosynthesis | 253066_At   | At4g37770 | 0  |     | 23  |      | 23  | 23  | 0   |
| ACC  | ACS4     | biosynthesis | 266830_At   | At2g22810 | 0  |     |     |      |     |     |     |
| ACC  | ACS3     | biosynthesis | 246172_s_At | At3g61510 |    |     |     |      |     |     |     |
| ACC  | ACO      | biosynthesis | 249125_At   | At5g43450 | 5  |     |     | 23   | 1   | 5   | 7   |
| ACC  | ACO      | biosynthesis | 249128_At   | At5g43440 | 6  |     |     | 8    | 8   | 10  | 9   |
| ACC  | ETO3     | biosynthesis | 252279_At   | At3g49700 |    |     |     |      |     |     |     |
| ACC  | ACO1     | biosynthesis | 265948_At   | At2g19590 |    |     |     |      | 7   | 4   |     |
| ACC  | ACO      | biosynthesis | 247774_At   | At5g58660 | 13 | 20  | 15  |      | 16  |     |     |
| ACC  | ACS7     | biosynthesis | 253999_At   | At4g26200 | 15 |     | 16  |      |     |     |     |
| ACC  | ACS12    | biosynthesis | 248425_At   | At5g51690 | 15 |     |     |      |     |     |     |
| ACC  | ACO      | biosynthesis | 265615_At   | At2g25450 |    |     |     | 7    | 7   | 9   | 9   |
| ACC  | EAT1     | biosynthesis | 265194_At   | At1g05010 | 16 | 16  | 17  | 18   | 17  | 17  |     |
| ACC  | ACO2     | biosynthesis | 260637_At   | At1g62380 | 18 |     | 18  | 18   | 19  | 1   |     |
| ACC  | ETO1     | biosynthesis | 246298_At   | At3g51770 | 18 | 17  | 20  |      | 18  | 20  | 18  |
| ACC  | ACO      | biosynthesis | 264843_At   | At1g03400 | 23 | 21  | 0   | 20   | 23  | 4   | 1   |
| ACC  | ACS2     | biosynthesis | 259439_At   | At1g01480 |    | 0   |     |      |     |     |     |
| ACC  | ACS6     | biosynthesis | 254926_At   | At4g11280 |    | 3   | 4   | 4    | 4   |     |     |
| ACC  | ETO2     | biosynthesis | 247159_At   | At5g65800 | 23 |     |     |      |     |     |     |
| ACC  | ETR2     | receptor     | 257922_At   | At3g23150 | 13 | 19  | 17  | 18   | 16  |     |     |
| ACC  | ERS1     | receptor     | 245098_At   | At2g40940 | 13 | 18  | 17  | 17   | 16  | 22  | 17  |
| ACC  | EIN4     | receptor     | 258818_At   | At3g04580 | 16 | 10  | 16  | 16   | 14  |     | 17  |
| ACC  | ERS2     | receptor     | 263653_At   | At1g04310 | 18 | 21  | 17  | 19   | 17  | 23  |     |

|     |           |              |             |           |    |    |    |    |    |    |    |
|-----|-----------|--------------|-------------|-----------|----|----|----|----|----|----|----|
| ACC | ETR1      | receptor     | 260133_At   | At1g66340 | 20 | 20 |    |    |    |    | 17 |
| ACC | EIR1      | signaling    | 247947_At   | At5g57090 |    | 16 |    | 0  |    | 0  |    |
| ACC | CTR1      | signaling    | 250911_At   | At5g03730 | 13 | 19 | 17 | 17 | 17 | 20 | 15 |
| ACC | EBF1      | signaling    | 265633_At   | At2g25490 |    | 18 | 18 | 17 | 17 | 21 | 15 |
| ACC | EIN3      | signaling    | 257981_At   | At3g20770 | 18 | 19 | 18 | 20 | 18 | 22 | 17 |
| ACC | EBF2      | signaling    | 246935_At   | At5g25350 | 18 | 18 | 18 | 19 | 17 | 22 | 18 |
| ACC | EIN2      | signaling    | 250928_At   | At5g03280 |    | 20 | 19 | 21 | 18 |    | 18 |
| ACC | HLS1      | signaling    | 253054_At   | At4g37580 | 18 | 18 | 19 | 21 |    | 23 |    |
| ACC | EIL1      | signaling    | 266302_At   | At2g27050 | 18 | 18 | 18 | 20 | 18 | 20 |    |
| BR  | BRox2     | biosynthesis | 256598_At   | At3g30180 | 0  | 3  | 22 | 22 | 2  | 23 | 1  |
| BR  | BRox1     | biosynthesis | 249484_At   | At5g38970 |    |    |    |    |    |    |    |
| BR  | DWF7      | biosynthesis | 258484_At   | At3g02580 | 4  | 6  |    | 5  | 8  |    |    |
| BR  | UgT73C5   | biosynthesis | 265200_s_At | At2g36790 | 6  | 5  |    | 4  | 5  |    |    |
| BR  | DET2      | biosynthesis | 266095_At   | At2g38050 | 8  | 18 | 15 | 17 |    |    | 17 |
| BR  | ROT3L     | biosynthesis | 256788_At   | At3g13730 | 10 |    |    |    |    |    |    |
| BR  | DWF5      | biosynthesis | 261865_At   | At1g50430 | 18 |    | 12 | 13 | 9  |    |    |
| BR  | CPD       | biosynthesis | 250752_At   | At5g05690 | 18 | 20 | 18 | 22 | 22 | 21 | 20 |
| BR  | DWF1      | biosynthesis | 257938_At   | At3g19820 | 20 |    |    | 21 | 18 | 22 | 20 |
| BR  | DWF4      | biosynthesis | 252184_At   | At3g50660 | 22 | 1  | 20 | 23 | 16 |    | 14 |
| BR  | ROT3      | biosynthesis | 246216_At   | At4g36380 | 23 | 22 | 0  | 22 | 1  |    |    |
| BR  | SOB7      | catabolism   | 262525_At   | At1g17060 | 20 | 18 | 22 | 21 |    | 21 |    |
| BR  | BAS1      | catabolism   | 267614_At   | At2g26710 | 23 | 18 | 23 | 23 | 0  | 18 | 23 |
| BR  | IMK2      | receptor     | 252078_At   | At3g51740 | 13 |    |    |    |    |    |    |
| BR  | BRL3      | receptor     | 256981_At   | At3g13380 | 14 | 23 | 16 |    |    | 11 | 15 |
| BR  | BRL1      | receptor     | 264537_At   | At1g55610 |    |    |    |    |    |    |    |
| BR  | BRL2      | receptor     | 265250_At   | At2g01950 | 18 | 6  | 19 | 23 |    |    | 20 |
| BR  | BRI1      | receptor     | 252890_At   | At4g39400 | 23 |    | 0  |    |    | 20 |    |
| BR  | BEH4      | signaling    | 264248_At   | At1g78700 | 0  | 19 | 23 | 23 | 0  | 22 |    |
| BR  | BIM1      | signaling    | 250569_At   | At5g08130 | 0  | 8  | 4  | 4  |    | 22 | 16 |
| BR  | BIM2      | signaling    | 259645_At   | At1g69010 | 0  | 23 | 1  | 23 | 0  | 23 | 23 |
| BR  | BEH1      | signaling    | 252178_At   | At3g50750 | 0  | 18 | 0  | 22 | 22 | 23 | 23 |
| BR  | BEH3      | signaling    | 254610_At   | At4g18890 |    |    |    |    |    |    | 20 |
| BR  | BAK1      | signaling    | 253338_At   | At4g33430 | 13 | 22 |    |    | 12 |    | 15 |
| BR  | SERK1     | signaling    | 261521_at   | At1g71830 |    | 7  | 4  |    |    |    | 16 |
| BR  | BSU1      | signaling    | 264823_At   | At1g03445 |    |    |    |    |    |    |    |
| BR  | BKI1      | signaling    | 249190_at   | At5g42750 | 16 | 22 | 19 | 19 | 20 | 18 | 19 |
| BR  | BES1/BZR1 | signaling    | 259955_s_At | At1g19350 | 17 |    | 18 | 17 | 18 | 19 | 19 |
| BR  | BEH2      | signaling    | 246284_At   | At4g36780 | 18 | 17 | 18 | 19 | 18 | 21 | 19 |
| BR  | BIN2      | signaling    | 254616_At   | At4g18710 | 18 | 19 | 18 | 20 | 18 | 19 | 20 |
| BR  | BRS1      | signaling    | 253579_At   | At4g30610 | 23 | 7  | 6  | 6  | 6  |    | 21 |
| CK  | AtIPT5    | biosynthesis | 249972_At   | At5g19040 |    |    |    |    |    |    |    |
| CK  | AtIPT4    | biosynthesis | 254129_At   | At4g24650 |    |    |    |    |    |    |    |
| CK  | AtIPT7    | biosynthesis | 258103_At   | At3g23630 |    |    |    |    |    |    |    |
| CK  | CYP735A1  | biosynthesis | 249566_At   | At5g38450 |    |    |    |    |    |    |    |
| CK  | AtIPT8    | biosynthesis | 257039_At   | At3g19160 |    |    |    |    |    |    |    |
| CK  | AtIPT6    | biosynthesis | 255741_At   | At1g25410 |    |    |    |    |    |    |    |
| CK  | AtIPT3    | biosynthesis | 251154_At   | At3g63110 |    | 8  |    |    |    |    | 15 |
| CK  | AtIPT9    | biosynthesis | 246152_At   | At5g20040 | 14 | 11 | 12 | 10 |    | 15 | 19 |
| CK  | UgT76C2   | biosynthesis | 250753_At   | At5g05860 | 17 |    | 16 | 14 | 17 | 18 | 20 |

|    |           |              |           |           |    |    |    |    |    |    |    |    |
|----|-----------|--------------|-----------|-----------|----|----|----|----|----|----|----|----|
| CK | UgT76C1   | biosynthesis | 250750_At | At5g05870 | 19 | 21 |    |    |    |    |    | 22 |
| CK | CYP735A2  | biosynthesis | 264470_At | At1g67110 | 20 |    |    |    |    |    |    |    |
| CK | AtIPT1    | biosynthesis | 260240_At | At1g68460 |    |    |    |    |    |    |    |    |
| CK | CKX5      | catabolism   | 261109_At | At1g75450 | 0  | 13 |    | 0  | 23 | 0  |    |    |
| CK | CKX1      | catabolism   | 245108_At | At2g41510 | 2  |    |    |    |    |    |    |    |
| CK | CKX3      | catabolism   | 247956_At | At5g56970 | 14 |    |    |    |    |    |    |    |
| CK | CKX2      | catabolism   | 265945_At | At2g19500 |    |    |    |    |    |    |    |    |
| CK | CKX6      | catabolism   | 251178_At | At3g63440 |    |    |    |    |    |    |    |    |
| CK | CKX4      | catabolism   | 253696_At | At4g29740 | 17 |    |    |    | 5  |    |    |    |
| CK | AHK4      | receptor     | 263599_At | At2g01830 | 15 | 7  |    |    |    |    |    | 16 |
| CK | AHK2      | receptor     | 249693_At | At5g35750 | 19 | 11 | 15 | 20 |    |    | 11 |    |
| CK | AHK3      | receptor     | 264448_At | At1g27320 |    | 23 | 21 | 21 | 21 |    |    | 21 |
| CK | CKI1      | signaling    | 245125_At | At2g47430 |    |    |    |    |    |    |    |    |
| CK | ARR4      | signalling   | 263236_At | At1g10470 | 14 | 9  | 11 | 7  | 12 | 12 | 16 |    |
| CK | ARR7      | signalling   | 259466_At | At1g19050 | 15 | 8  |    | 9  |    |    | 12 | 17 |
| CK | ARR15     | signalling   | 262212_At | At1g74890 | 15 |    |    |    |    |    |    |    |
| CK | ARR2      | signalling   | 252374_At | At3g48100 | 17 | 16 |    | 0  |    |    | 7  | 18 |
| CK | ARR8      | signalling   | 266372_At | At2g41310 | 17 | 7  | 5  |    | 23 |    |    |    |
| CK | ARR16     | signalling   | 266078_At | At2g40670 | 17 |    | 16 |    | 18 |    |    | 19 |
| CK | ARR6      | signalling   | 247406_At | At5g62920 |    | 8  | 8  | 7  |    |    | 10 | 17 |
| CK | ARR9      | signalling   | 251665_At | At3g57040 | 22 | 9  | 0  | 0  | 23 | 12 | 22 |    |
| CK | PUP1      | transport    | 245671_At | At1g28230 | 7  | 23 | 5  | 9  | 7  | 9  | 10 |    |
| GA | ATGA3OX3  | biosynthesis | 254397_At | At4g21690 |    |    |    |    |    |    |    |    |
| GA | ATGA20OX5 | biosynthesis | 259453_At | At1g44090 |    |    |    |    |    |    |    |    |
| GA | GA1       | biosynthesis | 255461_At | At4g02780 |    |    |    |    |    |    |    |    |
| GA | ATGA20OX2 | biosynthesis | 248371_At | At5g51810 | 0  | 19 |    |    |    |    |    | 23 |
| GA | AtKAO2    | biosynthesis | 266335_At | At2g32440 |    | 18 | 23 | 17 |    |    |    | 7  |
| GA | GA5       | biosynthesis | 254065_At | At4g25420 |    |    |    |    |    |    |    |    |
| GA | GA4       | biosynthesis | 261768_At | At1g15550 | 2  | 9  |    | 4  | 4  | 23 | 3  |    |
| GA | ADC2      | biosynthesis | 253203_at | At4g34710 | 2  | 5  | 18 | 16 | 18 |    |    | 21 |
| GA | ATGA20OX3 | biosynthesis | 250611_At | At5g07200 |    |    |    |    |    |    |    |    |
| GA | GA4H      | biosynthesis | 260300_At | At1g80340 | 6  |    |    |    |    |    |    |    |
| GA | ATGA20OX  | biosynthesis | 248443_At | At5g51310 | 6  |    |    |    |    |    |    |    |
| GA | ATGA20OX4 | biosynthesis | 259714_At | At1g60980 |    |    |    |    |    |    |    |    |
| GA | ATGA3OX4  | biosynthesis | 260299_At | At1g80330 |    |    |    |    |    |    |    |    |
| GA | GA2       | biosynthesis | 262891_At | At1g79460 | 9  |    |    |    | 8  | 9  | 10 |    |
| GA | ATGA20OX  | biosynthesis | 252530_At | At3g46500 |    | 19 |    |    |    |    |    |    |
| GA | AtKAO1    | biosynthesis | 264586_At | At1g05160 |    | 19 | 19 | 22 | 19 |    |    |    |
| GA | ADC1      | biosynthesis | 263241_at | At2g16500 |    | 6  | 5  | 7  | 0  |    |    |    |
| GA | GA3       | biosynthesis | 246864_At | At5g25900 | 22 | 16 | 18 | 0  | 18 | 23 | 21 |    |
| GA | ATGA2OX6  | catabolism   | 259445_At | At1g02400 | 0  | 22 | 17 | 21 |    |    | 21 |    |
| GA | ATGA2OX1  | catabolism   | 260773_At | At1g78440 | 4  |    |    |    |    |    | 5  |    |
| GA | ATGA2OX7  | catabolism   | 256211_At | At1g50960 |    |    |    |    |    |    | 5  |    |
| GA | ATGA2OX8  | catabolism   | 254459_At | At4g21200 | 8  |    |    |    |    |    |    |    |
| GA | ATGA2OX4  | catabolism   | 259614_At | At1g47990 |    |    |    |    |    |    |    |    |
| GA | ATGA2OX2  | catabolism   | 260023_At | At1g30040 | 18 |    |    |    |    |    |    |    |
| GA | ATGA2OX3  | catabolism   | 266995_At | At2g34500 | 23 | 0  |    | 0  |    |    | 0  | 23 |
| GA | RGL2      | homeostasis  | 259042_At | At3g03450 | 5  | 7  |    |    |    |    |    |    |
| GA | RGL1      | homeostasis  | 260141_At | At1g66350 | 20 |    | 16 |    |    | 16 | 23 |    |

|     |            |                |             |           |    |    |    |    |    |    |    |    |
|-----|------------|----------------|-------------|-----------|----|----|----|----|----|----|----|----|
| GA  | RGA1       | homeostasis    | 266331_At   | At2g01570 | 23 | 17 |    |    |    |    | 1  | 4  |
| GA  | GAI        | homeostasis    | 262850_At   | At1g14920 | 23 | 18 | 22 | 22 |    |    | 21 | 23 |
| GA  | RGL3       | homeostasis    | 246432_At   | At5g17490 | 23 |    |    |    |    |    |    |    |
| GA  | ATGID1C    | receptor       | 246782_At   | At5g27320 |    | 18 | 19 | 20 | 12 |    |    |    |
| GA  | ATGID1B    | receptor       | 251200_At   | At3g63010 |    | 22 | 16 | 19 |    |    |    | 19 |
| GA  | ATGID1A    | receptor       | 259302_At   | At3g05120 | 13 | 20 | 16 |    | 15 |    |    | 14 |
| IAA | YUCCA-like | biosynthesis   | 253794_At   | At4g28720 | 24 | 18 | 23 | 23 | 23 | 23 | 23 | 0  |
| IAA | CYP79B2    | biosynthesis   | 252827_At   | At4g39950 | 4  | 6  | 6  | 6  | 13 | 8  |    |    |
| IAA | TRP2       | biosynthesis   | 251847_At   | At3g54640 |    | 6  | 10 | 9  | 10 | 11 |    |    |
| IAA | YUCCA6     | biosynthesis   | 246900_At   | At5g25620 |    |    |    |    |    |    |    |    |
| IAA | YUCCA1     | biosynthesis   | 253439_At   | At4g32540 |    |    |    |    |    |    |    |    |
| IAA | FASS       | biosynthesis   | 249998_At   | At5g18580 | 18 |    |    | 18 | 18 |    |    |    |
| IAA | AAO1       | biosynthesis   | 246133_At   | At5g20960 |    |    |    |    |    |    | 13 |    |
| IAA | YUCCA2     | biosynthesis   | 254758_At   | At4g13260 | 23 | 13 |    |    |    |    |    |    |
| IAA | SUR2       | catabolism     | 253534_At   | At4g31500 | 4  | 7  | 9  | 10 | 11 | 11 | 14 |    |
| IAA | SUR1       | catabolism     | 263714_At   | At2g20610 | 6  | 6  | 7  | 6  | 7  | 9  | 8  |    |
| IAA | IAMT1      | conjugAtion    | 248104_At   | At5g55250 | 0  |    |    |    |    |    |    |    |
| IAA | gH3.5      | conjugAtion    | 253908_At   | At4g27260 | 24 | 18 | 23 | 23 | 23 | 21 | 23 |    |
| IAA | DFL2       | conjugAtion    | 255403_At   | At4g03400 | 5  | 8  | 3  | 5  |    | 6  | 7  |    |
| IAA | ILR1       | conjugAtion    | 258610_At   | At3g02875 | 19 | 22 |    |    |    |    |    | 23 |
| IAA | IAR3       | conjugAtion    | 256178_s_At | At1g51760 | 20 |    | 18 |    | 16 | 12 |    |    |
| IAA | gH3.6      | conjugAtion    | 248163_At   | At5g54510 | 23 | 18 | 21 | 19 | 20 | 18 | 20 |    |
| IAA | ACX1       | IBA metabolism | 245249_At   | At4g16760 | 3  | 22 | 21 | 22 | 22 | 3  | 3  |    |
| IAA | PED2       | IBA metabolism | 247422_at   | At5g62810 | 5  | 5  |    |    | 4  | 11 | 14 |    |
| IAA | PEX6       | IBA metabolism | 263170_at   | At1g03000 | 5  | 16 |    |    |    | 15 | 17 |    |
| IAA | ACX4       | IBA metabolism | 246304_At   | At3g51840 | 18 | 20 | 18 | 20 | 22 | 21 | 20 |    |
| IAA | TIR1       | receptor       | 251199_At   | At3g62980 | 18 | 19 | 20 | 23 | 23 | 19 | 19 |    |
| IAA | IAA14      | signaling      | 245593_At   | At4g14550 | 0  |    | 1  | 23 | 2  |    | 1  |    |
| IAA | IAA29      | signaling      | 253423_At   | At4g32280 | 24 | 17 | 22 |    | 23 | 21 | 23 |    |
| IAA | ARF18      | signaling      | 251289_At   | At3g61830 | 1  | 14 | 0  | 23 | 1  | 23 |    |    |
| IAA | IAA7       | signaling      | 257769_At   | At3g23050 | 18 | 20 |    | 18 | 18 | 23 |    |    |
| IAA | IAA3       | signaling      | 263656_At   | At1g04240 | 21 | 18 | 23 | 19 | 4  | 20 |    |    |
| IAA | IAA19      | signaling      | 258399_At   | At3g15540 | 23 | 18 | 1  |    | 1  | 23 | 0  |    |
| IAA | IAA1       | signaling      | 245397_At   | At4g14560 | 23 | 20 | 22 |    |    | 0  | 4  |    |
| IAA | IAA2       | signaling      | 257766_At   | At3g23030 | 23 | 19 | 20 | 20 | 22 | 20 | 23 |    |
| IAA | IAA6       | signaling      | 260152_At   | At1g52830 | 23 |    |    |    |    | 23 | 23 |    |

\*Numbers represent time of peak transcript abundance in hours after dawn or subjective dawn (circadian conditions).

horm, hormone; SD, short day photocycles; Col, Columbia; Ler, Landsberg-erecta

lhy, late elongated hypocotyl; lux, lux arrhythmo; b9, phyB-9; DD, continuous dark; LL, continuous light

Affy ID, Affymetrix ATH1 Genechip probe identification number; MIPS ID, Arabidopsis thaliana gene identification number

GA, Gibberellins; IAA, auxin; BR, brassinosteroid; ABA, abscisic acid; CK, cytokinin; ACC, ethylene
