# Supplementary material
Source: PubMed Central journal article supplement (PMC2553831)
Supplement: pbio.0060225.st002.pdf [file pbio.0060225.st002.pdf]

Table S2. Phytohormone genes that match growth-associated models

| Affy ID     | Ler              | p    | lhy              | p    | Ler (lhy)        | p     | lux-2            | p    | phyb             | p    | col              | p    |
|-------------|------------------|------|------------------|------|------------------|-------|------------------|------|------------------|------|------------------|------|
| 245098_at   | dawn-box_ERS2    | 0.02 | dawn-box_ERS2    | 0.00 | dawn-box_ERS2    | 0.000 | dawn-spike_GAOX6 | 0.00 | dawn-box_ERS2    | 0.00 | dawn-box_ERS2    | 0.00 |
| 245108_at   | dawn-spike_GAOX6 | 0.01 | dawn-box_ERS2    | 0.02 | dawn-spike_GAOX6 | 0.370 | dawn-spike_AC8   | 0.00 | dawn-box_ERS2    | 0.30 | dawn-spike_AC8   | 0.29 |
| 245125_at   | dawn-spike_AC8   | 0.82 | dawn-spike_AC8   | 0.31 | dawn-spike_AC8   | 0.024 | dawn-spike_GAOX6 | 0.00 | dawn-box_ERS2    | 0.15 | dawn-spike_AC8   | 0.78 |
| 245249_at   | dawn-spike_GAOX6 | 0.38 | dawn-spike_GAOX6 | 0.01 | dark-box_TIR1    | 0.000 | dawn-spike_AC8   | 0.08 | dark-box_TIR1    | 0.00 | dawn-spike_GAOX6 | 0.00 |
| 245397_at   | dawn-spike_AC8   | 0.00 | dark-box_TIR1    | 0.00 | dawn-spike_GAOX6 | 0.000 | dark-box_TIR1    | 0.32 | dark-box_TIR1    | 0.18 | dawn-spike_AC8   | 0.32 |
| 245593_at   | dawn-spike_GAOX6 | 0.00 | dawn-box_ERS2    | 0.57 | dawn-spike_GAOX6 | 0.007 | dawn-spike_GAOX6 | 0.02 | dawn-spike_GAOX6 | 0.00 | dawn-spike_GAOX6 | 0.01 |
| 245671_at   | dawn-spike_AC8   | 0.84 | dawn-spike_GAOX6 | 0.00 | dawn-spike_AC8   | 0.886 | dawn-spike_AC8   | 0.92 | dawn-spike_AC8   | 0.57 | dawn-spike_AC8   | 0.79 |
| 246133_at   | dawn-box_ERS2    | 0.22 | dawn-spike_GAOX6 | 0.64 | dawn-box_ERS2    | 0.064 | dawn-box_ERS2    | 0.22 | dark-box_TIR1    | 0.04 | dawn-spike_AC8   | 0.00 |
| 246152_at   | dawn-box_ERS2    | 0.17 | dawn-box_ERS2    | 0.60 | dawn-box_ERS2    | 0.507 | dawn-box_ERS2    | 0.02 | dawn-box_ERS2    | 0.72 | dawn-box_ERS2    | 0.03 |
| 246172_s_at | dawn-spike_GAOX6 | 0.08 | dawn-box_ERS2    | 0.67 | dawn-spike_AC8   | 0.100 | dawn-spike_AC8   | 0.04 | dawn-box_ERS2    | 0.13 | dark-box_TIR1    | 0.03 |
| 246216_at   | dawn-spike_GAOX6 | 0.00 | dark-box_TIR1    | 0.01 | dawn-spike_GAOX6 | 0.000 | dawn-spike_GAOX6 | 0.16 | dark-box_TIR1    | 0.00 | dawn-spike_GAOX6 | 0.02 |
| 246284_at   | dark-box_TIR1    | 0.02 | dawn-box_ERS2    | 0.00 | dawn-box_ERS2    | 0.000 | dark-box_TIR1    | 0.00 | dawn-box_ERS2    | 0.00 | dawn-box_ERS2    | 0.00 |
| 246298_at   | dark-box_TIR1    | 0.02 | dawn-box_ERS2    | 0.00 | dark-box_TIR1    | 0.000 | dawn-box_ERS2    | 0.02 | dawn-spike_AC8   | 0.00 | dark-box_TIR1    | 0.01 |
| 246304_at   | dawn-box_ERS2    | 0.00 | dark-box_TIR1    | 0.00 | dawn-box_ERS2    | 0.000 | dark-box_TIR1    | 0.02 | dark-box_TIR1    | 0.00 | dawn-spike_GAOX6 | 0.00 |
| 246325_at   | dawn-spike_GAOX6 | 0.03 | dawn-spike_GAOX6 | 0.00 | dawn-box_ERS2    | 0.522 | dawn-spike_AC8   | 0.81 | dawn-spike_GAOX6 | 0.00 | dawn-box_ERS2    | 0.03 |
| 246330_at   | dawn-spike_AC8   | 0.89 | dawn-spike_AC8   | 0.94 | dawn-spike_AC8   | 0.870 | dawn-spike_AC8   | 0.97 | dawn-spike_AC8   | 0.81 | dark-box_TIR1    | 0.93 |
| 246432_at   | dawn-spike_AC8   | 0.00 | dark-box_TIR1    | 0.00 | dawn-box_ERS2    | 0.002 | dawn-spike_GAOX6 | 0.00 | dark-box_TIR1    | 0.00 | dark-box_TIR1    | 0.00 |
| 246782_at   | dawn-spike_AC8   | 0.75 | dark-box_TIR1    | 0.00 | dawn-box_ERS2    | 0.000 | dawn-box_ERS2    | 0.03 | dark-box_TIR1    | 0.00 | dawn-box_ERS2    | 0.02 |
| 246864_at   | dark-box_TIR1    | 0.00 | dawn-box_ERS2    | 0.00 | dawn-box_ERS2    | 0.000 | dawn-spike_GAOX6 | 0.10 | dawn-spike_AC8   | 0.00 | dawn-spike_GAOX6 | 0.00 |
| 246900_at   | dawn-box_ERS2    | 0.13 | dawn-spike_AC8   | 0.97 | dawn-spike_AC8   | 0.982 | dark-box_TIR1    | 0.02 | dawn-spike_AC8   | 0.04 | dawn-box_ERS2    | 0.50 |
| 246935_at   | dawn-box_ERS2    | 0.04 | dawn-box_ERS2    | 0.00 | dawn-box_ERS2    | 0.000 | dawn-spike_GAOX6 | 0.00 | dawn-box_ERS2    | 0.00 | dawn-box_ERS2    | 0.00 |
| 247025_at   | dawn-spike_AC8   | 0.36 | dawn-spike_AC8   | 0.90 | dawn-spike_GAOX6 | 0.258 | dawn-spike_AC8   | 0.78 | dawn-spike_GAOX6 | 0.29 | dawn-spike_GAOX6 | 0.26 |
| 247159_at   | dawn-spike_AC8   | 0.00 | dawn-box_ERS2    | 0.00 | dawn-spike_AC8   | 0.024 | dawn-spike_GAOX6 | 0.00 | dawn-spike_AC8   | 0.48 | dawn-spike_AC8   | 0.00 |
| 247406_at   | dark-box_TIR1    | 0.22 | dawn-spike_AC8   | 0.39 | dawn-spike_AC8   | 0.344 | dawn-box_ERS2    | 0.92 | dawn-spike_AC8   | 0.63 | dawn-spike_AC8   | 0.00 |
| 247422_at   | dawn-box_ERS2    | 0.95 | dawn-spike_GAOX6 | 0.52 | dawn-spike_AC8   | 0.808 | dawn-box_ERS2    | 0.33 | dawn-spike_GAOX6 | 0.90 | dark-box_TIR1    | 0.75 |
| 247774_at   | dawn-box_ERS2    | 0.02 | dark-box_TIR1    | 0.00 | dawn-box_ERS2    | 0.008 | dawn-box_ERS2    | 0.03 | dark-box_TIR1    | 0.00 | dawn-box_ERS2    | 0.00 |
| 247947_at   | dawn-box_ERS2    | 0.23 | dark-box_TIR1    | 0.03 | dawn-spike_AC8   | 0.589 | dawn-spike_GAOX6 | 0.00 | dawn-spike_AC8   | 0.00 | dawn-spike_AC8   | 0.69 |
| 247956_at   | dawn-box_ERS2    | 0.46 | dawn-box_ERS2    | 0.90 | dawn-spike_AC8   | 0.393 | dawn-spike_GAOX6 | 0.00 | dark-box_TIR1    | 0.22 | dawn-spike_AC8   | 0.69 |
| 247957_at   | dawn-spike_GAOX6 | 0.61 | dawn-spike_GAOX6 | 0.29 | dawn-spike_GAOX6 | 0.292 | dawn-spike_AC8   | 0.80 | dawn-spike_GAOX6 | 0.66 | dawn-spike_AC8   | 0.71 |
| 248104_at   | dawn-spike_GAOX6 | 0.00 | dawn-spike_GAOX6 | 0.00 | dawn-spike_AC8   | 0.031 | dark-box_TIR1    | 0.00 | dawn-box_ERS2    | 0.00 | dark-box_TIR1    | 0.54 |
| 248163_at   | dawn-spike_AC8   | 0.00 | dawn-box_ERS2    | 0.00 | dark-box_TIR1    | 0.000 | dark-box_TIR1    | 0.05 | dawn-box_ERS2    | 0.00 | dark-box_TIR1    | 0.00 |
| 248371_at   | dawn-spike_AC8   | 0.00 | dark-box_TIR1    | 0.00 | dawn-spike_AC8   | 0.000 | dark-box_TIR1    | 0.24 | dawn-spike_AC8   | 0.00 | dawn-spike_AC8   | 0.07 |
| 248425_at   | dawn-box_ERS2    | 0.09 | dawn-box_ERS2    | 0.00 | dawn-box_ERS2    | 0.000 | dawn-box_ERS2    | 0.00 | dark-box_TIR1    | 0.00 | dawn-box_ERS2    | 0.00 |
| 248443_at   | dawn-spike_GAOX6 | 0.74 | dawn-box_ERS2    | 0.97 | dark-box_TIR1    | 0.914 | dawn-spike_AC8   | 0.97 | dawn-box_ERS2    | 0.84 | dawn-spike_AC8   | 0.87 |
| 248678_at   | dawn-box_ERS2    | 0.03 | dawn-box_ERS2    | 0.98 | dawn-spike_AC8   | 0.940 | dark-box_TIR1    | 0.10 | dawn-box_ERS2    | 0.69 | dawn-spike_AC8   | 0.68 |

Table S2. Phytohormone genes that match growth-associated models

|           |                  |      |                  |      |                  |       |                  |      |                  |      |                  |      |
|-----------|------------------|------|------------------|------|------------------|-------|------------------|------|------------------|------|------------------|------|
| 248964_at | dawn-spike_GAOX6 | 0.00 | dawn-spike_AC8   | 0.00 | dawn-spike_GAOX6 | 0.000 | dawn-spike_AC8   | 0.86 | dawn-spike_AC8   | 0.05 | dawn-spike_GAOX6 | 0.42 |
| 249125_at | dawn-spike_AC8   | 0.67 | dawn-box_ERS2    | 0.72 | dawn-spike_GAOX6 | 0.396 | dawn-spike_AC8   | 0.75 | dawn-spike_GAOX6 | 0.02 | dawn-spike_GAOX6 | 0.08 |
| 249128_at | dawn-spike_AC8   | 0.87 | dawn-box_ERS2    | 0.80 | dawn-box_ERS2    | 0.568 | dawn-box_ERS2    | 0.90 | dawn-spike_AC8   | 0.70 | dawn-spike_AC8   | 0.81 |
| 249190_at | dawn-box_ERS2    | 0.00 | dawn-spike_GAOX6 | 0.00 | dawn-box_ERS2    | 0.006 | dawn-box_ERS2    | 0.00 | dawn-box_ERS2    | 0.00 | dark-box_TIR1    | 0.00 |
| 249484_at | dawn-spike_AC8   | 0.30 | dawn-spike_GAOX6 | 0.13 | dark-box_TIR1    | 0.785 | dawn-spike_GAOX6 | 0.42 | dawn-box_ERS2    | 0.01 | dawn-spike_GAOX6 | 0.00 |
| 249566_at | dawn-spike_AC8   | 0.17 | dawn-box_ERS2    | 0.28 | dawn-box_ERS2    | 0.281 | dawn-spike_AC8   | 0.00 | dawn-spike_AC8   | 0.71 | dawn-box_ERS2    | 0.73 |
| 249693_at | dawn-box_ERS2    | 0.02 | dawn-box_ERS2    | 0.65 | dawn-box_ERS2    | 0.023 | dawn-box_ERS2    | 0.38 | dark-box_TIR1    | 0.01 | dawn-box_ERS2    | 0.64 |
| 249972_at | dawn-spike_GAOX6 | 0.01 | dawn-box_ERS2    | 0.04 | dawn-box_ERS2    | 0.826 | dawn-spike_AC8   | 0.04 | dark-box_TIR1    | 0.00 | dawn-spike_AC8   | 0.20 |
| 249998_at | dark-box_TIR1    | 0.00 | dawn-box_ERS2    | 0.00 | dark-box_TIR1    | 0.000 | dark-box_TIR1    | 0.00 | dawn-spike_GAOX6 | 0.00 | dawn-box_ERS2    | 0.00 |
| 250243_at | dawn-spike_AC8   | 0.09 | dawn-spike_AC8   | 0.91 | dawn-spike_AC8   | 0.085 | dawn-spike_AC8   | 0.61 | dawn-spike_GAOX6 | 0.21 | dawn-spike_GAOX6 | 0.07 |
| 250569_at | dawn-spike_AC8   | 0.00 | dawn-spike_AC8   | 0.82 | dawn-spike_AC8   | 0.046 | dawn-spike_GAOX6 | 0.00 | dawn-spike_AC8   | 0.23 | dawn-spike_AC8   | 0.02 |
| 250611_at | dawn-spike_AC8   | 0.21 | dawn-spike_AC8   | 0.00 | dark-box_TIR1    | 0.005 | dark-box_TIR1    | 0.00 | dark-box_TIR1    | 0.63 | dawn-spike_AC8   | 0.01 |
| 250750_at | dark-box_TIR1    | 0.00 | dark-box_TIR1    | 0.01 | dawn-box_ERS2    | 0.004 | dawn-box_ERS2    | 0.89 | dark-box_TIR1    | 0.03 | dawn-spike_GAOX6 | 0.03 |
| 250752_at | dark-box_TIR1    | 0.00 | dark-box_TIR1    | 0.00 | dark-box_TIR1    | 0.001 | dawn-spike_GAOX6 | 0.00 | dawn-spike_GAOX6 | 0.00 | dark-box_TIR1    | 0.00 |
| 250753_at | dawn-box_ERS2    | 0.00 | dawn-box_ERS2    | 0.30 | dawn-box_ERS2    | 0.000 | dawn-box_ERS2    | 0.01 | dawn-box_ERS2    | 0.05 | dawn-box_ERS2    | 0.00 |
| 250911_at | dawn-box_ERS2    | 0.05 | dark-box_TIR1    | 0.00 | dawn-box_ERS2    | 0.000 | dark-box_TIR1    | 0.00 | dawn-box_ERS2    | 0.00 | dawn-box_ERS2    | 0.00 |
| 250928_at | dark-box_TIR1    | 0.05 | dark-box_TIR1    | 0.00 | dark-box_TIR1    | 0.000 | dawn-spike_AC8   | 0.00 | dark-box_TIR1    | 0.00 | dawn-box_ERS2    | 0.00 |
| 251154_at | dawn-box_ERS2    | 0.04 | dawn-spike_AC8   | 0.73 | dawn-spike_AC8   | 0.001 | dark-box_TIR1    | 0.00 | dawn-box_ERS2    | 0.13 | dawn-box_ERS2    | 0.00 |
| 251178_at | dawn-box_ERS2    | 0.05 | dawn-box_ERS2    | 0.00 | dark-box_TIR1    | 0.000 | dark-box_TIR1    | 0.12 | dawn-box_ERS2    | 0.30 | dawn-box_ERS2    | 0.18 |
| 251199_at | dark-box_TIR1    | 0.00 | dark-box_TIR1    | 0.00 | dark-box_TIR1    | 0.000 | dawn-box_ERS2    | 0.00 | dawn-spike_AC8   | 0.00 | dawn-spike_GAOX6 | 0.00 |
| 251200_at | dawn-spike_AC8   | 0.44 | dawn-spike_GAOX6 | 0.00 | dawn-box_ERS2    | 0.000 | dawn-box_ERS2    | 0.56 | dark-box_TIR1    | 0.00 | dawn-spike_AC8   | 0.08 |
| 251289_at | dawn-spike_GAOX6 | 0.00 | dawn-box_ERS2    | 0.04 | dawn-spike_AC8   | 0.000 | dawn-spike_GAOX6 | 0.00 | dawn-spike_GAOX6 | 0.00 | dawn-spike_AC8   | 0.00 |
| 251665_at | dark-box_TIR1    | 0.00 | dawn-spike_AC8   | 0.71 | dawn-spike_GAOX6 | 0.000 | dawn-box_ERS2    | 0.48 | dawn-spike_GAOX6 | 0.05 | dawn-spike_GAOX6 | 0.00 |
| 251847_at | dawn-box_ERS2    | 0.71 | dawn-spike_AC8   | 0.09 | dawn-box_ERS2    | 0.909 | dawn-box_ERS2    | 0.68 | dawn-spike_AC8   | 0.93 | dawn-box_ERS2    | 0.89 |
| 252078_at | dawn-box_ERS2    | 0.06 | dawn-box_ERS2    | 0.06 | dawn-box_ERS2    | 0.117 | dawn-box_ERS2    | 0.03 | dawn-box_ERS2    | 0.51 | dawn-box_ERS2    | 0.46 |
| 252178_at | dawn-spike_GAOX6 | 0.00 | dawn-box_ERS2    | 0.00 | dark-box_TIR1    | 0.033 | dawn-spike_GAOX6 | 0.00 | dawn-spike_GAOX6 | 0.00 | dark-box_TIR1    | 0.00 |
| 252184_at | dawn-spike_GAOX6 | 0.01 | dawn-spike_AC8   | 0.00 | dark-box_TIR1    | 0.006 | dawn-box_ERS2    | 0.80 | dawn-spike_AC8   | 0.00 | dawn-spike_AC8   | 0.10 |
| 252279_at | dawn-box_ERS2    | 0.65 | dawn-box_ERS2    | 0.22 | dawn-spike_AC8   | 0.019 | dawn-spike_GAOX6 | 0.01 | dawn-spike_GAOX6 | 0.14 | dawn-spike_GAOX6 | 0.19 |
| 252374_at | dawn-box_ERS2    | 0.00 | dawn-spike_AC8   | 0.22 | dawn-spike_AC8   | 0.006 | dawn-spike_AC8   | 0.89 | dawn-spike_AC8   | 0.00 | dawn-spike_AC8   | 0.01 |
| 252375_at | dawn-spike_AC8   | 0.00 | dawn-box_ERS2    | 0.00 | dawn-spike_AC8   | 0.000 | dawn-box_ERS2    | 0.00 | dawn-spike_AC8   | 0.02 | dark-box_TIR1    | 0.00 |
| 252530_at | dawn-box_ERS2    | 0.31 | dawn-box_ERS2    | 0.00 | dawn-box_ERS2    | 0.000 | dawn-spike_GAOX6 | 0.00 | dawn-spike_AC8   | 0.00 | dawn-box_ERS2    | 0.02 |
| 252827_at | dawn-spike_GAOX6 | 0.67 | dawn-spike_AC8   | 0.58 | dawn-spike_AC8   | 0.913 | dawn-box_ERS2    | 0.93 | dawn-spike_AC8   | 0.98 | dawn-box_ERS2    | 0.33 |
| 252890_at | dawn-spike_AC8   | 0.00 | dawn-spike_GAOX6 | 0.00 | dawn-spike_GAOX6 | 0.004 | dark-box_TIR1    | 0.01 | dawn-spike_GAOX6 | 0.13 | dawn-spike_GAOX6 | 0.00 |
| 253054_at | dawn-box_ERS2    | 0.01 | dawn-box_ERS2    | 0.00 | dawn-box_ERS2    | 0.000 | dawn-spike_GAOX6 | 0.00 | dark-box_TIR1    | 0.00 | dark-box_TIR1    | 0.00 |
| 253066_at | dawn-spike_AC8   | 0.00 | dawn-spike_AC8   | 0.03 | dawn-spike_AC8   | 0.000 | dawn-spike_GAOX6 | 0.00 | dawn-spike_GAOX6 | 0.02 | dawn-spike_AC8   | 0.00 |
| 253203_at | dawn-spike_AC8   | 0.10 | dawn-spike_AC8   | 0.89 | dawn-box_ERS2    | 0.000 | dawn-spike_AC8   | 0.10 | dawn-box_ERS2    | 0.00 | dawn-box_ERS2    | 0.00 |

Table S2. Phytohormone genes that match growth-associated models

|             |                  |      |                  |      |                  |       |                  |      |                  |      |                  |      |
|-------------|------------------|------|------------------|------|------------------|-------|------------------|------|------------------|------|------------------|------|
| 253338_at   | dawn-box_ERS2    | 0.25 | dark-box_TIR1    | 0.00 | dawn-spike_AC8   | 0.613 | dawn-box_ERS2    | 0.02 | dawn-box_ERS2    | 0.11 | dawn-box_ERS2    | 0.07 |
| 253423_at   | dawn-spike_AC8   | 0.00 | dawn-box_ERS2    | 0.00 | dawn-spike_GAOX6 | 0.000 | dark-box_TIR1    | 0.00 | dawn-spike_GAOX6 | 0.02 | dawn-spike_GAOX6 | 0.00 |
| 253439_at   | dawn-box_ERS2    | 0.15 | dawn-spike_AC8   | 0.00 | dark-box_TIR1    | 0.001 | dawn-spike_AC8   | 0.00 | dawn-spike_GAOX6 | 0.14 | dawn-spike_AC8   | 0.00 |
| 253534_at   | dawn-spike_GAOX6 | 0.77 | dawn-spike_AC8   | 0.62 | dawn-box_ERS2    | 0.971 | dawn-box_ERS2    | 0.90 | dawn-spike_AC8   | 0.97 | dawn-box_ERS2    | 0.77 |
| 253579_at   | dark-box_TIR1    | 0.06 | dawn-spike_AC8   | 0.87 | dawn-spike_AC8   | 0.850 | dark-box_TIR1    | 0.55 | dawn-spike_AC8   | 0.88 | dawn-spike_AC8   | 0.88 |
| 253696_at   | dark-box_TIR1    | 0.01 | dawn-spike_AC8   | 0.63 | dawn-spike_AC8   | 0.080 | dawn-spike_AC8   | 0.12 | dawn-spike_AC8   | 0.78 | dawn-spike_AC8   | 0.50 |
| 253794_at   | dawn-spike_AC8   | 0.00 | dawn-box_ERS2    | 0.00 | dawn-spike_GAOX6 | 0.000 | dawn-spike_GAOX6 | 0.00 | dawn-spike_GAOX6 | 0.00 | dawn-spike_GAOX6 | 0.00 |
| 253908_at   | dawn-spike_AC8   | 0.00 | dark-box_TIR1    | 0.00 | dawn-spike_GAOX6 | 0.000 | dawn-spike_GAOX6 | 0.00 | dawn-spike_GAOX6 | 0.00 | dawn-spike_GAOX6 | 0.00 |
| 253994_at   | dawn-spike_AC8   | 0.68 | dawn-spike_GAOX6 | 0.00 | dawn-spike_GAOX6 | 0.000 | dawn-spike_AC8   | 0.73 | dawn-spike_GAOX6 | 0.25 | dawn-box_ERS2    | 0.90 |
| 253999_at   | dawn-box_ERS2    | 0.31 | dawn-spike_AC8   | 0.00 | dark-box_TIR1    | 0.061 | dawn-spike_GAOX6 | 0.19 | dawn-box_ERS2    | 0.17 | dawn-spike_AC8   | 0.21 |
| 254065_at   | dawn-spike_AC8   | 0.01 | dark-box_TIR1    | 0.00 | dawn-spike_GAOX6 | 0.004 | dawn-spike_AC8   | 0.26 | dawn-spike_GAOX6 | 0.62 | dawn-spike_AC8   | 0.01 |
| 254129_at   | dawn-spike_AC8   | 0.47 | dawn-spike_AC8   | 0.16 | dawn-box_ERS2    | 0.007 | dawn-spike_AC8   | 0.00 | dawn-spike_AC8   | 0.06 | dark-box_TIR1    | 0.69 |
| 254397_at   | dark-box_TIR1    | 0.71 | dawn-spike_AC8   | 0.15 | dawn-box_ERS2    | 0.467 | dawn-spike_AC8   | 0.00 | dark-box_TIR1    | 0.00 | dark-box_TIR1    | 0.55 |
| 254459_at   | dawn-spike_AC8   | 0.49 | dark-box_TIR1    | 0.00 | dawn-box_ERS2    | 0.144 | dawn-spike_AC8   | 0.00 | dawn-box_ERS2    | 0.08 | dawn-box_ERS2    | 0.00 |
| 254562_at   | dawn-spike_GAOX6 | 0.00 | dawn-spike_GAOX6 | 0.00 | dawn-spike_AC8   | 0.000 | dawn-spike_GAOX6 | 0.77 | dawn-spike_AC8   | 0.23 | dawn-spike_AC8   | 0.68 |
| 254610_at   | dawn-spike_AC8   | 0.38 | dawn-spike_AC8   | 0.23 | dark-box_TIR1    | 0.052 | dark-box_TIR1    | 0.22 | dawn-spike_AC8   | 0.68 | dawn-spike_AC8   | 0.34 |
| 254616_at   | dark-box_TIR1    | 0.00 | dawn-box_ERS2    | 0.00 | dawn-box_ERS2    | 0.000 | dawn-box_ERS2    | 0.00 | dark-box_TIR1    | 0.00 | dark-box_TIR1    | 0.00 |
| 254668_at   | dawn-spike_AC8   | 0.08 | dawn-box_ERS2    | 0.25 | dawn-box_ERS2    | 0.818 | dawn-spike_AC8   | 0.00 | dawn-spike_AC8   | 0.23 | dawn-spike_AC8   | 0.00 |
| 254758_at   | dawn-spike_AC8   | 0.00 | dawn-box_ERS2    | 0.02 | dawn-spike_AC8   | 0.153 | dawn-spike_AC8   | 0.00 | dawn-box_ERS2    | 0.05 | dawn-spike_AC8   | 0.00 |
| 254926_at   | dawn-spike_AC8   | 0.00 | dawn-spike_AC8   | 0.53 | dawn-spike_GAOX6 | 0.634 | dawn-box_ERS2    | 0.51 | dawn-spike_GAOX6 | 0.68 | dawn-spike_GAOX6 | 0.65 |
| 255403_at   | dawn-spike_GAOX6 | 0.76 | dawn-spike_AC8   | 0.57 | dawn-spike_AC8   | 0.534 | dawn-spike_AC8   | 0.90 | dawn-spike_AC8   | 0.54 | dawn-spike_AC8   | 0.87 |
| 255461_at   | dawn-spike_AC8   | 0.21 | dawn-spike_AC8   | 0.05 | dawn-box_ERS2    | 0.267 | dawn-spike_GAOX6 | 0.53 | dawn-spike_AC8   | 0.13 | dawn-spike_AC8   | 0.01 |
| 255741_at   | dawn-spike_AC8   | 0.60 | dawn-box_ERS2    | 0.01 | dawn-spike_AC8   | 0.185 | dawn-spike_GAOX6 | 0.00 | dawn-spike_AC8   | 0.07 | dawn-box_ERS2    | 0.89 |
| 256178_s_at | dark-box_TIR1    | 0.00 | dawn-box_ERS2    | 0.03 | dawn-box_ERS2    | 0.000 | dawn-box_ERS2    | 0.69 | dawn-spike_GAOX6 | 0.00 | dawn-box_ERS2    | 0.00 |
| 256190_at   | dawn-spike_GAOX6 | 0.35 | dawn-spike_AC8   | 0.00 | dawn-spike_AC8   | 0.004 | dawn-spike_AC8   | 0.00 | dawn-spike_GAOX6 | 0.25 | dawn-spike_AC8   | 0.00 |
| 256211_at   | dark-box_TIR1    | 0.66 | dawn-box_ERS2    | 0.00 | dawn-spike_AC8   | 0.002 | dawn-spike_AC8   | 0.78 | dark-box_TIR1    | 0.01 | dawn-spike_GAOX6 | 0.47 |
| 256351_at   | dawn-spike_AC8   | 0.22 | dawn-spike_AC8   | 0.69 | dawn-box_ERS2    | 0.864 | dawn-spike_AC8   | 0.00 | dawn-spike_AC8   | 0.55 | dawn-spike_GAOX6 | 0.06 |
| 256598_at   | dawn-spike_AC8   | 0.00 | dawn-spike_GAOX6 | 0.14 | dark-box_TIR1    | 0.000 | dawn-spike_AC8   | 0.00 | dawn-spike_GAOX6 | 0.00 | dawn-spike_AC8   | 0.00 |
| 256788_at   | dawn-box_ERS2    | 0.39 | dawn-box_ERS2    | 0.01 | dawn-box_ERS2    | 0.575 | dawn-box_ERS2    | 0.16 | dawn-spike_GAOX6 | 0.01 | dawn-spike_AC8   | 0.83 |
| 256898_at   | dawn-spike_AC8   | 0.03 | dark-box_TIR1    | 0.21 | dawn-spike_GAOX6 | 0.068 | dawn-spike_GAOX6 | 0.00 | dawn-box_ERS2    | 0.11 | dark-box_TIR1    | 0.12 |
| 256981_at   | dawn-box_ERS2    | 0.20 | dawn-spike_GAOX6 | 0.00 | dawn-box_ERS2    | 0.006 | dawn-box_ERS2    | 0.45 | dawn-spike_AC8   | 0.01 | dawn-box_ERS2    | 0.66 |
| 257035_at   | dawn-spike_GAOX6 | 0.69 | dawn-spike_AC8   | 0.73 | dawn-spike_AC8   | 0.162 | dawn-spike_AC8   | 0.81 | dawn-spike_GAOX6 | 0.65 | dawn-spike_GAOX6 | 0.56 |
| 257039_at   | dawn-spike_AC8   | 0.93 | dawn-box_ERS2    | 0.63 | dawn-box_ERS2    | 0.210 | dawn-spike_AC8   | 0.00 | dark-box_TIR1    | 0.22 | dawn-spike_AC8   | 0.06 |
| 257242_at   | dawn-spike_AC8   | 0.83 | dawn-spike_AC8   | 0.16 | dawn-spike_GAOX6 | 0.309 | dawn-spike_AC8   | 0.01 | dawn-spike_AC8   | 0.01 | dawn-box_ERS2    | 0.14 |
| 257280_at   | dawn-spike_GAOX6 | 0.30 | dark-box_TIR1    | 0.30 | dawn-spike_GAOX6 | 0.002 | dawn-spike_AC8   | 0.54 | dawn-spike_GAOX6 | 0.65 | dawn-spike_GAOX6 | 0.63 |
| 257766_at   | dawn-spike_GAOX6 | 0.00 | dark-box_TIR1    | 0.00 | dark-box_TIR1    | 0.000 | dark-box_TIR1    | 0.00 | dawn-box_ERS2    | 0.00 | dark-box_TIR1    | 0.00 |

Table S2. Phytohormone genes that match growth-associated models

|             |                  |      |                  |      |                  |       |                  |      |                  |      |                  |      |
|-------------|------------------|------|------------------|------|------------------|-------|------------------|------|------------------|------|------------------|------|
| 257769_at   | dark-box_TIR1    | 0.01 | dark-box_TIR1    | 0.00 | dark-box_TIR1    | 0.000 | dawn-spike_GAOX6 | 0.00 | dawn-box_ERS2    | 0.00 | dawn-box_ERS2    | 0.00 |
| 257922_at   | dawn-box_ERS2    | 0.10 | dark-box_TIR1    | 0.00 | dawn-box_ERS2    | 0.000 | dawn-spike_GAOX6 | 0.01 | dawn-box_ERS2    | 0.00 | dawn-box_ERS2    | 0.00 |
| 257938_at   | dark-box_TIR1    | 0.00 | dark-box_TIR1    | 0.26 | dark-box_TIR1    | 0.012 | dark-box_TIR1    | 0.00 | dawn-spike_GAOX6 | 0.00 | dawn-box_ERS2    | 0.00 |
| 257981_at   | dark-box_TIR1    | 0.01 | dark-box_TIR1    | 0.00 | dark-box_TIR1    | 0.000 | dark-box_TIR1    | 0.00 | dark-box_TIR1    | 0.00 | dawn-box_ERS2    | 0.00 |
| 258103_at   | dawn-box_ERS2    | 0.73 | dawn-spike_GAOX6 | 0.00 | dawn-spike_AC8   | 0.004 | dawn-spike_AC8   | 0.00 | dawn-box_ERS2    | 0.63 | dawn-spike_GAOX6 | 0.04 |
| 258399_at   | dawn-spike_AC8   | 0.00 | dawn-box_ERS2    | 0.00 | dawn-spike_AC8   | 0.000 | dawn-spike_GAOX6 | 0.00 | dawn-spike_GAOX6 | 0.07 | dawn-spike_AC8   | 0.01 |
| 258484_at   | dawn-spike_AC8   | 0.31 | dawn-spike_AC8   | 0.98 | dawn-spike_AC8   | 0.464 | dawn-spike_GAOX6 | 0.45 | dawn-spike_AC8   | 0.41 | dawn-spike_AC8   | 0.86 |
| 258610_at   | dawn-box_ERS2    | 0.00 | dawn-spike_GAOX6 | 0.00 | dawn-box_ERS2    | 0.000 | dawn-box_ERS2    | 0.34 | dark-box_TIR1    | 0.00 | dawn-spike_AC8   | 0.03 |
| 258818_at   | dawn-box_ERS2    | 0.01 | dawn-box_ERS2    | 0.90 | dawn-box_ERS2    | 0.001 | dawn-box_ERS2    | 0.17 | dark-box_TIR1    | 0.63 | dawn-box_ERS2    | 0.23 |
| 259042_at   | dawn-spike_GAOX6 | 0.57 | dawn-spike_AC8   | 0.82 | dawn-spike_AC8   | 0.804 | dawn-spike_GAOX6 | 0.80 | dawn-spike_AC8   | 0.03 | dark-box_TIR1    | 0.27 |
| 259302_at   | dawn-box_ERS2    | 0.23 | dark-box_TIR1    | 0.00 | dawn-box_ERS2    | 0.000 | dawn-box_ERS2    | 0.18 | dawn-box_ERS2    | 0.14 | dawn-box_ERS2    | 0.06 |
| 259439_at   | dawn-spike_GAOX6 | 0.10 | dawn-spike_AC8   | 0.00 | dawn-box_ERS2    | 0.481 | dawn-spike_AC8   | 0.07 | dawn-spike_AC8   | 0.02 | dawn-spike_AC8   | 0.38 |
| 259445_at   | dawn-spike_AC8   | 0.00 | dawn-spike_GAOX6 | 0.00 | dawn-box_ERS2    | 0.000 | dawn-box_ERS2    | 0.03 | dawn-spike_GAOX6 | 0.01 | dawn-box_ERS2    | 0.01 |
| 259453_at   | dawn-spike_AC8   | 0.39 | dawn-box_ERS2    | 0.60 | dawn-box_ERS2    | 0.922 | dawn-spike_AC8   | 0.00 | dawn-box_ERS2    | 0.62 | dawn-spike_AC8   | 0.09 |
| 259466_at   | dawn-box_ERS2    | 0.02 | dawn-spike_AC8   | 0.47 | dawn-spike_AC8   | 0.204 | dawn-box_ERS2    | 0.46 | dawn-spike_AC8   | 0.47 | dawn-box_ERS2    | 0.41 |
| 259614_at   | dark-box_TIR1    | 0.20 | dawn-box_ERS2    | 0.23 | dawn-spike_GAOX6 | 0.002 | dawn-spike_AC8   | 0.00 | dawn-spike_AC8   | 0.00 | dawn-spike_AC8   | 0.37 |
| 259645_at   | dawn-spike_AC8   | 0.00 | dawn-spike_GAOX6 | 0.00 | dawn-spike_AC8   | 0.000 | dawn-spike_GAOX6 | 0.00 | dawn-spike_AC8   | 0.00 | dawn-spike_AC8   | 0.00 |
| 259669_at   | dawn-spike_GAOX6 | 0.00 | dawn-spike_AC8   | 0.91 | dark-box_TIR1    | 0.126 | dawn-box_ERS2    | 0.98 | dawn-spike_AC8   | 0.42 | dark-box_TIR1    | 0.66 |
| 259714_at   | dawn-spike_AC8   | 0.40 | dawn-spike_GAOX6 | 0.00 | dark-box_TIR1    | 0.002 | dawn-box_ERS2    | 0.00 | dawn-box_ERS2    | 0.09 | dawn-spike_GAOX6 | 0.07 |
| 259955_s_at | dawn-box_ERS2    | 0.00 | dawn-box_ERS2    | 0.57 | dawn-box_ERS2    | 0.000 | dawn-box_ERS2    | 0.00 | dawn-box_ERS2    | 0.00 | dawn-box_ERS2    | 0.00 |
| 260023_at   | dawn-box_ERS2    | 0.00 | dawn-spike_GAOX6 | 0.00 | dawn-spike_AC8   | 0.869 | dark-box_TIR1    | 0.00 | dawn-spike_AC8   | 0.49 | dawn-spike_AC8   | 0.35 |
| 260133_at   | dark-box_TIR1    | 0.01 | dark-box_TIR1    | 0.00 | dawn-box_ERS2    | 0.011 | dawn-box_ERS2    | 0.33 | dark-box_TIR1    | 0.00 | dark-box_TIR1    | 0.00 |
| 260141_at   | dark-box_TIR1    | 0.00 | dawn-spike_AC8   | 0.00 | dawn-box_ERS2    | 0.239 | dawn-spike_GAOX6 | 0.00 | dawn-box_ERS2    | 0.10 | dawn-box_ERS2    | 0.01 |
| 260152_at   | dawn-spike_AC8   | 0.00 | dawn-spike_GAOX6 | 0.00 | dawn-spike_AC8   | 0.000 | dawn-spike_GAOX6 | 0.00 | dawn-box_ERS2    | 0.03 | dawn-spike_AC8   | 0.00 |
| 260240_at   | dawn-spike_GAOX6 | 0.19 | dawn-spike_GAOX6 | 0.73 | dawn-spike_GAOX6 | 0.002 | dawn-spike_GAOX6 | 0.00 | dawn-spike_AC8   | 0.24 | dawn-spike_AC8   | 0.01 |
| 260299_at   | dawn-spike_AC8   | 0.85 | dawn-box_ERS2    | 0.43 | dawn-spike_GAOX6 | 0.000 | dawn-spike_AC8   | 0.00 | dawn-box_ERS2    | 0.45 | dawn-spike_AC8   | 0.42 |
| 260300_at   | dawn-spike_GAOX6 | 0.72 | dawn-spike_AC8   | 0.82 | dawn-spike_AC8   | 0.755 | dawn-spike_AC8   | 0.60 | dawn-box_ERS2    | 0.93 | dawn-spike_AC8   | 0.63 |
| 260345_at   | dark-box_TIR1    | 0.00 | dark-box_TIR1    | 0.00 | dawn-box_ERS2    | 0.000 | dawn-box_ERS2    | 0.00 | dawn-spike_GAOX6 | 0.00 | dawn-box_ERS2    | 0.00 |
| 260637_at   | dark-box_TIR1    | 0.00 | dark-box_TIR1    | 0.00 | dawn-box_ERS2    | 0.000 | dawn-spike_AC8   | 0.04 | dawn-box_ERS2    | 0.00 | dark-box_TIR1    | 0.00 |
| 260773_at   | dawn-spike_GAOX6 | 0.70 | dawn-box_ERS2    | 0.77 | dawn-box_ERS2    | 0.890 | dawn-spike_GAOX6 | 0.76 | dawn-spike_GAOX6 | 0.73 | dawn-spike_GAOX6 | 0.52 |
| 260797_at   | dawn-spike_GAOX6 | 0.67 | dawn-box_ERS2    | 0.41 | dawn-box_ERS2    | 0.147 | dawn-spike_GAOX6 | 0.00 | dawn-box_ERS2    | 0.01 | dawn-spike_AC8   | 0.01 |
| 261109_at   | dawn-spike_AC8   | 0.00 | dawn-box_ERS2    | 0.13 | dawn-spike_AC8   | 0.002 | dawn-spike_AC8   | 0.00 | dark-box_TIR1    | 0.04 | dawn-spike_AC8   | 0.00 |
| 261521_at   | dawn-box_ERS2    | 0.14 | dawn-spike_AC8   | 0.95 | dark-box_TIR1    | 0.625 | dawn-box_ERS2    | 0.45 | dawn-spike_AC8   | 0.91 | dawn-box_ERS2    | 0.37 |
| 261768_at   | dawn-spike_GAOX6 | 0.00 | dawn-spike_GAOX6 | 0.73 | dawn-spike_AC8   | 0.533 | dawn-spike_GAOX6 | 0.00 | dawn-spike_GAOX6 | 0.61 | dawn-spike_GAOX6 | 0.68 |
| 261865_at   | dawn-box_ERS2    | 0.03 | dawn-box_ERS2    | 0.07 | dawn-spike_AC8   | 0.285 | dark-box_TIR1    | 0.50 | dawn-box_ERS2    | 0.30 | dawn-box_ERS2    | 0.96 |
| 262212_at   | dawn-box_ERS2    | 0.02 | dawn-spike_AC8   | 0.80 | dark-box_TIR1    | 0.000 | dawn-box_ERS2    | 0.27 | dawn-spike_AC8   | 0.83 | dawn-box_ERS2    | 0.05 |

Table S2. Phytohormone genes that match growth-associated models

|             |                  |      |                  |      |                  |       |                  |      |                  |      |                  |      |
|-------------|------------------|------|------------------|------|------------------|-------|------------------|------|------------------|------|------------------|------|
| 262525_at   | dark-box_TIR1    | 0.00 | dark-box_TIR1    | 0.00 | dawn-spike_GAOX6 | 0.000 | dark-box_TIR1    | 0.02 | dark-box_TIR1    | 0.00 | dawn-spike_AC8   | 0.00 |
| 262850_at   | dawn-spike_AC8   | 0.00 | dawn-box_ERS2    | 0.00 | dawn-spike_GAOX6 | 0.001 | dark-box_TIR1    | 0.00 | dark-box_TIR1    | 0.00 | dawn-spike_AC8   | 0.01 |
| 262891_at   | dawn-spike_AC8   | 0.98 | dawn-box_ERS2    | 0.08 | dawn-box_ERS2    | 0.966 | dawn-box_ERS2    | 0.73 | dawn-spike_AC8   | 0.24 | dawn-spike_AC8   | 0.80 |
| 263170_at   | dawn-spike_AC8   | 0.44 | dawn-box_ERS2    | 0.00 | dawn-spike_AC8   | 0.066 | dawn-box_ERS2    | 0.31 | dawn-spike_AC8   | 0.59 | dawn-box_ERS2    | 0.29 |
| 263236_at   | dawn-box_ERS2    | 0.01 | dawn-spike_AC8   | 0.75 | dawn-box_ERS2    | 0.862 | dawn-box_ERS2    | 0.42 | dawn-spike_AC8   | 0.81 | dawn-box_ERS2    | 0.47 |
| 263241_at   | dark-box_TIR1    | 0.11 | dawn-spike_AC8   | 0.87 | dawn-spike_AC8   | 0.760 | dawn-box_ERS2    | 0.74 | dawn-spike_AC8   | 0.77 | dawn-spike_AC8   | 0.20 |
| 263377_at   | dawn-spike_GAOX6 | 0.21 | dawn-spike_GAOX6 | 0.00 | dawn-spike_AC8   | 0.001 | dawn-spike_AC8   | 0.00 | dawn-spike_GAOX6 | 0.00 | dawn-box_ERS2    | 0.02 |
| 263570_at   | dawn-spike_GAOX6 | 0.77 | dawn-spike_AC8   | 0.02 | dark-box_TIR1    | 0.096 | dawn-spike_AC8   | 0.45 | dawn-spike_AC8   | 0.02 | dawn-box_ERS2    | 0.68 |
| 263599_at   | dawn-box_ERS2    | 0.02 | dawn-spike_AC8   | 0.88 | dark-box_TIR1    | 0.080 | dawn-box_ERS2    | 0.34 | dawn-spike_AC8   | 0.26 | dawn-spike_AC8   | 0.87 |
| 263653_at   | dawn-box_ERS2    | 0.02 | dark-box_TIR1    | 0.00 | dawn-box_ERS2    | 0.000 | dawn-spike_GAOX6 | 0.00 | dawn-box_ERS2    | 0.00 | dawn-box_ERS2    | 0.00 |
| 263656_at   | dawn-spike_GAOX6 | 0.00 | dawn-box_ERS2    | 0.00 | dawn-spike_AC8   | 0.000 | dark-box_TIR1    | 0.01 | dawn-box_ERS2    | 0.00 | dawn-spike_GAOX6 | 0.11 |
| 263714_at   | dawn-spike_AC8   | 0.96 | dawn-spike_AC8   | 0.88 | dawn-spike_AC8   | 0.948 | dawn-box_ERS2    | 0.91 | dawn-spike_AC8   | 0.96 | dawn-spike_AC8   | 0.95 |
| 263907_at   | dawn-spike_AC8   | 0.88 | dawn-spike_GAOX6 | 0.00 | dawn-box_ERS2    | 0.866 | dawn-spike_AC8   | 0.53 | dawn-box_ERS2    | 0.47 | dawn-spike_AC8   | 0.01 |
| 264248_at   | dawn-spike_AC8   | 0.00 | dawn-box_ERS2    | 0.00 | dawn-spike_AC8   | 0.000 | dawn-spike_GAOX6 | 0.00 | dawn-spike_GAOX6 | 0.00 | dawn-spike_AC8   | 0.00 |
| 264448_at   | dark-box_TIR1    | 0.27 | dark-box_TIR1    | 0.01 | dark-box_TIR1    | 0.000 | dawn-box_ERS2    | 0.00 | dark-box_TIR1    | 0.00 | dark-box_TIR1    | 0.00 |
| 264470_at   | dawn-box_ERS2    | 0.00 | dawn-spike_GAOX6 | 0.74 | dawn-spike_AC8   | 0.970 | dawn-spike_GAOX6 | 0.61 | dawn-box_ERS2    | 0.68 | dawn-box_ERS2    | 0.66 |
| 264537_at   | dawn-box_ERS2    | 0.00 | dawn-spike_AC8   | 0.00 | dark-box_TIR1    | 0.000 | dark-box_TIR1    | 0.00 | dawn-box_ERS2    | 0.64 | dawn-box_ERS2    | 0.15 |
| 264586_at   | dawn-box_ERS2    | 0.02 | dark-box_TIR1    | 0.00 | dawn-box_ERS2    | 0.000 | dawn-spike_GAOX6 | 0.00 | dawn-spike_GAOX6 | 0.00 | dark-box_TIR1    | 0.00 |
| 264593_at   | dawn-box_ERS2    | 0.47 | dawn-spike_AC8   | 0.92 | dawn-spike_AC8   | 0.862 | dark-box_TIR1    | 0.05 | dawn-box_ERS2    | 0.88 | dawn-spike_AC8   | 0.68 |
| 264623_at   | dawn-box_ERS2    | 0.57 | dawn-box_ERS2    | 0.04 | dawn-box_ERS2    | 0.381 | dawn-spike_GAOX6 | 0.18 | dawn-spike_GAOX6 | 0.31 | dawn-spike_GAOX6 | 0.78 |
| 264823_at   | dawn-box_ERS2    | 0.20 | dawn-spike_AC8   | 0.09 | dawn-box_ERS2    | 0.446 | dawn-spike_AC8   | 0.00 | dawn-box_ERS2    | 0.27 | dawn-spike_AC8   | 0.02 |
| 264843_at   | dawn-spike_GAOX6 | 0.00 | dark-box_TIR1    | 0.00 | dawn-spike_GAOX6 | 0.003 | dark-box_TIR1    | 0.73 | dark-box_TIR1    | 0.00 | dawn-spike_GAOX6 | 0.00 |
| 265194_at   | dawn-box_ERS2    | 0.01 | dawn-box_ERS2    | 0.00 | dawn-box_ERS2    | 0.000 | dawn-spike_AC8   | 0.03 | dawn-box_ERS2    | 0.00 | dawn-box_ERS2    | 0.00 |
| 265200_s_at | dawn-spike_AC8   | 0.84 | dawn-spike_AC8   | 0.61 | dark-box_TIR1    | 0.145 | dawn-spike_GAOX6 | 0.00 | dark-box_TIR1    | 0.73 | dawn-spike_GAOX6 | 0.60 |
| 265250_at   | dawn-box_ERS2    | 0.00 | dawn-spike_AC8   | 0.84 | dark-box_TIR1    | 0.000 | dawn-box_ERS2    | 0.15 | dawn-spike_AC8   | 0.02 | dark-box_TIR1    | 0.00 |
| 265615_at   | dawn-box_ERS2    | 0.22 | dawn-spike_AC8   | 0.01 | dawn-spike_GAOX6 | 0.001 | dawn-spike_AC8   | 0.95 | dawn-spike_AC8   | 0.77 | dawn-spike_AC8   | 0.95 |
| 265633_at   | dawn-box_ERS2    | 0.24 | dawn-box_ERS2    | 0.00 | dawn-box_ERS2    | 0.000 | dawn-box_ERS2    | 0.01 | dawn-box_ERS2    | 0.00 | dawn-box_ERS2    | 0.00 |
| 265945_at   | dark-box_TIR1    | 0.15 | dawn-box_ERS2    | 0.66 | dawn-spike_AC8   | 0.610 | dawn-spike_GAOX6 | 0.00 | dawn-spike_AC8   | 0.30 | dawn-spike_AC8   | 0.00 |
| 265948_at   | dawn-spike_AC8   | 0.69 | dawn-spike_AC8   | 0.10 | dawn-spike_AC8   | 0.836 | dawn-spike_AC8   | 0.07 | dawn-spike_AC8   | 0.85 | dawn-spike_AC8   | 0.98 |
| 266078_at   | dawn-box_ERS2    | 0.00 | dawn-box_ERS2    | 0.12 | dawn-box_ERS2    | 0.000 | dawn-box_ERS2    | 0.05 | dawn-box_ERS2    | 0.11 | dawn-box_ERS2    | 0.00 |
| 266095_at   | dawn-spike_GAOX6 | 0.85 | dark-box_TIR1    | 0.00 | dawn-box_ERS2    | 0.042 | dawn-box_ERS2    | 0.91 | dawn-box_ERS2    | 0.00 | dawn-spike_AC8   | 0.02 |
| 266302_at   | dark-box_TIR1    | 0.00 | dawn-box_ERS2    | 0.00 | dark-box_TIR1    | 0.001 | dark-box_TIR1    | 0.00 | dark-box_TIR1    | 0.00 | dark-box_TIR1    | 0.00 |
| 266331_at   | dawn-spike_GAOX6 | 0.00 | dark-box_TIR1    | 0.09 | dark-box_TIR1    | 0.006 | dawn-spike_GAOX6 | 0.00 | dawn-spike_AC8   | 0.72 | dawn-spike_GAOX6 | 0.00 |
| 266335_at   | dawn-spike_AC8   | 0.03 | dawn-box_ERS2    | 0.00 | dawn-spike_AC8   | 0.000 | dawn-spike_AC8   | 0.16 | dawn-box_ERS2    | 0.01 | dawn-spike_GAOX6 | 0.64 |
| 266372_at   | dark-box_TIR1    | 0.06 | dawn-spike_AC8   | 0.92 | dawn-spike_AC8   | 0.573 | dawn-box_ERS2    | 0.41 | dark-box_TIR1    | 0.78 | dark-box_TIR1    | 0.04 |
| 266778_at   | dawn-spike_AC8   | 0.86 | dawn-spike_AC8   | 0.29 | dawn-spike_AC8   | 0.940 | dawn-spike_AC8   | 0.56 | dark-box_TIR1    | 0.09 | dawn-spike_GAOX6 | 0.80 |

Table S2. Phytohormone genes that match growth-associated models

|           |                  |      |                |      |                  |       |                  |      |                  |      |                  |      |
|-----------|------------------|------|----------------|------|------------------|-------|------------------|------|------------------|------|------------------|------|
| 266830_at | dawn-spike_AC8   | 0.00 | dawn-box_ERS2  | 0.00 | dawn-spike_AC8   | 0.578 | dawn-spike_AC8   | 0.01 | dawn-spike_AC8   | 0.03 | dawn-spike_AC8   | 0.84 |
| 266995_at | dawn-spike_GAOX6 | 0.00 | dawn-spike_AC8 | 0.00 | dawn-spike_GAOX6 | 0.000 | dawn-spike_GAOX6 | 0.01 | dawn-spike_AC8   | 0.00 | dawn-spike_GAOX6 | 0.05 |
| 267614_at | dawn-spike_AC8   | 0.00 | dark-box_TIR1  | 0.00 | dawn-spike_GAOX6 | 0.000 | dark-box_TIR1    | 0.00 | dawn-spike_GAOX6 | 0.00 | dawn-spike_AC8   | 0.00 |
