# Supplementary material
Source: PubMed Central journal article supplement (PMC2553831)
Supplement: pbio.0060225.st003.pdf [file pbio.0060225.st003.pdf]

Table S3. 3-8mer words overrepresented in the 71 phytohormone gene promoters (500 bp).

| word            | count     | zscore      | onet p-vals       | corrected p-val    | hits      |
|-----------------|-----------|-------------|-------------------|--------------------|-----------|
| GCGTACGC        | 2         | 10.22       | 7.9967E-25        | 3.51E-20           | 1         |
| CAGTCAGG        | 3         | 7.36        | 9.3544E-14        | 2.05E-09           | 3         |
| CCGTGGTA        | 3         | 6.98        | 1.485E-12         | 2.17E-08           | 3         |
| <b>CCACATGG</b> | <b>6</b>  | <b>6.88</b> | <b>2.9361E-12</b> | <b>3.22E-08</b>    | <b>6</b>  |
| GATAGCGC        | 2         | 6.87        | 3.17E-12          | 2.78E-08           | 2         |
| CGAGCCCC        | 2         | 6.46        | 5.1696E-11        | 3.24E-07           | 2         |
| ACGGCTGG        | 3         | 6.45        | 5.6246E-11        | 3.08E-07           | 2         |
| GGTCATAC        | 4         | 6.42        | 6.9635E-11        | 3.39E-07           | 4         |
| CGGTCACA        | 4         | 6.42        | 6.9635E-11        | 3.05E-07           | 4         |
| GCGTGACC        | 3         | 6.40        | 7.5857E-11        | 3.02E-07           | 2         |
| CGCGTAAG        | 3         | 6.38        | 9.0743E-11        | 3.32E-07           | 3         |
| AAGCCGCG        | 3         | 6.38        | 9.0743E-11        | 3.06E-07           | 3         |
| ACTATAGT        | 14        | 6.33        | 1.2189E-10        | 3.82E-07           | 4         |
| ACGAGGCA        | 4         | 6.29        | 1.6171E-10        | 4.73E-07           | 4         |
| ATCGCGGC        | 2         | 6.22        | 2.4447E-10        | 6.70E-07           | 2         |
| ATTGCGGG        | 2         | 6.22        | 2.4447E-10        | 6.31E-07           | 2         |
| CTGTGCGC        | 1         | 6.16        | 3.6213E-10        | 8.82E-07           | 1         |
| GGAGGGCC        | 2         | 6.01        | 9.5382E-10        | 2.20E-06           | 2         |
| AATGCGCT        | 3         | 5.95        | 1.3549E-09        | 2.97E-06           | 3         |
| GAAGCCGC        | 3         | 5.90        | 1.8206E-09        | 3.80E-06           | 3         |
| CCGACAGG        | 2         | 5.63        | 9.2661E-09        | 1.85E-05           | 2         |
| ATACATAT        | 20        | 5.60        | 1.0718E-08        | 2.04E-05           | 13        |
| GGCATACC        | 2         | 5.46        | 2.4184E-08        | 4.24E-05           | 2         |
| GATGGGGC        | 2         | 5.46        | 2.4184E-08        | 4.08E-05           | 2         |
| ACTATA          | 66        | 5.41        | 3.2336E-08        | 5.25E-05           | 40        |
| GCCGACCC        | 2         | 5.38        | 3.7672E-08        | 5.90E-05           | 2         |
| CTGCCCCC        | 2         | 5.38        | 3.7672E-08        | 5.70E-05           | 2         |
| GACAGGTC        | 3         | 5.35        | 4.4957E-08        | 6.57E-05           | 3         |
| CTCACGTA        | 4         | 5.33        | 4.96E-08          | 7.02E-05           | 4         |
| <b>CACATGGA</b> | <b>6</b>  | <b>5.30</b> | <b>5.6951E-08</b> | <b>7.80E-05</b>    | <b>6</b>  |
| ACGCCCGG        | 1         | 5.20        | 9.7749E-08        | 0.000129876        | 1         |
| ACCCCGCG        | 1         | 5.20        | 9.7749E-08        | 0.000126056        | 1         |
| <b>CACATG</b>   | <b>41</b> | <b>5.20</b> | <b>9.8221E-08</b> | <b>0.000123046</b> | <b>32</b> |
| <b>CACATGG</b>  | <b>12</b> | <b>5.20</b> | <b>9.8863E-08</b> | <b>0.00012041</b>  | <b>12</b> |
| CCCCACA         | 9         | 5.18        | 1.0859E-07        | 0.000128682        | 9         |
| ACGTACTA        | 4         | 5.18        | 1.132E-07         | 0.000130615        | 3         |
| ATAGCGCG        | 2         | 5.17        | 1.1483E-07        | 0.000129098        | 2         |
| CACGGCTG        | 2         | 5.16        | 1.2566E-07        | 0.000137742        | 2         |
| ACCGTATG        | 3         | 5.10        | 1.7353E-07        | 0.000185576        | 3         |
| ATGTGGGG        | 4         | 5.09        | 1.7816E-07        | 0.000185991        | 4         |
| CCTTACGC        | 2         | 5.09        | 1.8096E-07        | 0.00018452         | 2         |
| AGAGAGAC        | 15        | 5.08        | 1.9255E-07        | 0.000191876        | 11        |
| CTACAGCA        | 3         | 5.06        | 0.000000207       | 0.000201692        | 3         |
| GAGAGACA        | 11        | 4.99        | 3.0242E-07        | 0.000288259        | 10        |
| ATAGGTGG        | 4         | 4.99        | 3.0903E-07        | 0.000288292        | 4         |
| ACAGTATC        | 5         | 4.97        | 3.2748E-07        | 0.000299139        | 5         |
| AGGAAAGG        | 7         | 4.95        | 3.7248E-07        | 0.000333301        | 5         |
| AGCCGTG         | 5         | 4.94        | 3.9164E-07        | 0.000343437        | 5         |

Table S3. 3-8mer words overrepresented in the 71 phytohormone gene promoters (500 bp).

|           |     |      |             |             |    |
|-----------|-----|------|-------------|-------------|----|
| GTGACCGA  | 3   | 4.93 | 4.0416E-07  | 0.000347467 | 3  |
| ACATGGGA  | 5   | 4.92 | 4.3492E-07  | 0.000366721 | 5  |
| CACGCTAC  | 2   | 4.89 | 4.9203E-07  | 0.000407048 | 2  |
| TACTATGA  | 7   | 4.85 | 6.0677E-07  | 0.000492675 | 7  |
| GTGGTACA  | 4   | 4.83 | 6.7747E-07  | 0.000540079 | 4  |
| CATACACC  | 4   | 4.83 | 6.9873E-07  | 0.000547081 | 4  |
| CTTGCCCTC | 4   | 4.82 | 7.0614E-07  | 0.000543183 | 3  |
| CCGCACCG  | 2   | 4.81 | 7.6482E-07  | 0.000578178 | 2  |
| GGTCTCTA  | 4   | 4.76 | 9.7617E-07  | 0.000725443 | 4  |
| CCAGGCGG  | 1   | 4.76 | 9.886E-07   | 0.000722436 | 1  |
| GCCCCGTA  | 1   | 4.76 | 9.886E-07   | 0.000710593 | 1  |
| ATGTGAGC  | 4   | 4.72 | 1.1645E-06  | 0.000823527 | 4  |
| CAATGCGC  | 2   | 4.72 | 1.1857E-06  | 0.00082521  | 2  |
| AGGTCCCG  | 2   | 4.72 | 1.1857E-06  | 0.000812316 | 2  |
| ACTATAAC  | 7   | 4.72 | 1.1946E-06  | 0.000805822 | 7  |
| AGAGACA   | 24  | 4.72 | 1.1985E-06  | 0.000796204 | 19 |
| ATACTGTG  | 4   | 4.71 | 1.2119E-06  | 0.000793089 | 4  |
| AATCTCAC  | 9   | 4.69 | 1.3602E-06  | 0.000877049 | 8  |
| TACATATA  | 19  | 4.67 | 1.4787E-06  | 0.000939639 | 13 |
| CGACAGGA  | 2   | 4.66 | 1.5533E-06  | 0.000972943 | 2  |
| GCCTCTAA  | 4   | 4.65 | 1.6376E-06  | 0.001011299 | 4  |
| TGCGATAA  | 4   | 4.64 | 1.7279E-06  | 0.001052243 | 4  |
| CCATCCGG  | 2   | 4.63 | 1.8708E-06  | 0.001123659 | 2  |
| CATGTGG   | 12  | 4.62 | 1.9234E-06  | 0.00113964  | 11 |
| CCCCTTGC  | 2   | 4.61 | 2.0139E-06  | 0.001177353 | 2  |
| GAGCCCCA  | 2   | 4.61 | 2.0139E-06  | 0.001161861 | 2  |
| AAAGCACG  | 4   | 4.60 | 2.0852E-06  | 0.001187372 | 4  |
| AATGCGTA  | 4   | 4.60 | 2.0941E-06  | 0.001177153 | 4  |
| CGCGGTGC  | 1   | 4.57 | 2.4634E-06  | 0.001367218 | 1  |
| CGCTATAC  | 2   | 4.56 | 2.5854E-06  | 0.001416993 | 2  |
| ATCGCGTA  | 2   | 4.56 | 2.5854E-06  | 0.001399499 | 2  |
| CTCTCCCC  | 4   | 4.54 | 2.7582E-06  | 0.00147483  | 3  |
| CTATA     | 148 | 4.51 | 3.2031E-06  | 0.001692086 | 59 |
| GAGGCAA   | 10  | 4.51 | 3.2113E-06  | 0.001676222 | 8  |
| AGCCGTGG  | 2   | 4.51 | 3.2886E-06  | 0.001696376 | 2  |
| CGTGACCC  | 2   | 4.51 | 3.2886E-06  | 0.001676651 | 2  |
| AGAGGGGG  | 3   | 4.49 | 3.6452E-06  | 0.001837097 | 3  |
| CATAGTAG  | 4   | 4.46 | 0.000004181 | 0.002083183 | 4  |
| AGAGAC    | 46  | 4.44 | 4.4832E-06  | 0.002208656 | 28 |
| GTGTCCCA  | 3   | 4.42 | 4.9359E-06  | 0.002404661 | 3  |
| CACCTTAC  | 3   | 4.42 | 4.9359E-06  | 0.002378236 | 3  |
| CTATAGTA  | 7   | 4.42 | 4.9616E-06  | 0.002364634 | 4  |
| GGGGCAGA  | 2   | 4.41 | 0.000005185 | 0.002418527 | 2  |
| CGGCTGGA  | 2   | 4.41 | 0.000005185 | 0.002444532 | 2  |
| CGGTCCCA  | 2   | 4.41 | 0.000005185 | 0.002393069 | 2  |
| AGCCCCAT  | 2   | 4.41 | 0.000005185 | 0.002368141 | 2  |
| CCGCGCAC  | 1   | 4.40 | 5.4466E-06  | 0.002461976 | 1  |
| GCGGCCCC  | 1   | 4.40 | 5.4466E-06  | 0.002436853 | 1  |
| GAAGGGTC  | 3   | 4.40 | 5.5194E-06  | 0.002444481 | 3  |

Table S3. 3-8mer words overrepresented in the 71 phytohormone gene promoters (500 bp).

|                 |          |             |                    |                    |          |
|-----------------|----------|-------------|--------------------|--------------------|----------|
| AGCCGCGA        | 2        | 4.39        | 5.6262E-06         | 0.002466864        | 2        |
| AATGGGGG        | 3        | 4.39        | 5.7803E-06         | 0.002509337        | 3        |
| GTCTCTA         | 13       | 4.36        | 6.4182E-06         | 0.002758945        | 10       |
| GACGCGGC        | 2        | 4.36        | 0.000006433        | 0.002738459        | 2        |
| ATATACAT        | 18       | 4.31        | 8.1856E-06         | 0.003451017        | 13       |
| CTATCAGA        | 4        | 4.30        | 8.3839E-06         | 0.003500957        | 3        |
| CCACGTGC        | 3        | 4.30        | 8.5931E-06         | 0.003554463        | 2        |
| CAATCCGA        | 4        | 4.29        | 8.9772E-06         | 0.003644577        | 4        |
| <b>ACATGGG</b>  | <b>9</b> | <b>4.28</b> | <b>9.4641E-06</b>  | <b>0.003806999</b> | <b>9</b> |
| CCAGTCAG        | 2        | 4.27        | 9.6878E-06         | 0.003861557        | 2        |
| GAAGCCAC        | 4        | 4.26        | 0.000010194        | 0.004026722        | 3        |
| ATACAGCG        | 2        | 4.24        | 0.000011045        | 0.00432392         | 2        |
| AAATAAAA        | 61       | 4.24        | 0.000011164        | 0.00433183         | 39       |
| TACGCGA         | 4        | 4.23        | 0.000011922        | 0.004545496        | 4        |
| <b>CACATGGG</b> | <b>4</b> | <b>4.22</b> | <b>0.000012372</b> | <b>0.004676403</b> | <b>4</b> |
| GAGCCCC         | 3        | 4.21        | 0.000012655        | 0.004742488        | 3        |
| GCGATAA         | 7        | 4.19        | 0.000013644        | 0.005069787        | 7        |
| CACGTGGG        | 4        | 4.19        | 0.000014067        | 0.005183039        | 4        |
| ATCACGGG        | 2        | 4.19        | 0.000014203        | 0.005189539        | 2        |
| ACTATACT        | 7        | 4.19        | 0.000014231        | 0.005156797        | 6        |
| CCCCAC          | 16       | 4.18        | 0.000014382        | 0.005168796        | 13       |
| GTGGGGGA        | 3        | 4.18        | 0.000014542        | 0.005183809        | 3        |
| CAGTGAAG        | 5        | 4.18        | 0.000014542        | 0.005142004        | 5        |
| CCCCACCA        | 4        | 4.16        | 0.000015816        | 0.005547747        | 3        |
| GTAAGCAC        | 3        | 4.15        | 0.000016821        | 0.005853441        | 3        |
| GGAAAGGA        | 6        | 4.15        | 0.000016953        | 0.005852923        | 6        |
| ATGGGCGG        | 2        | 4.14        | 0.00001704         | 0.005836999        | 2        |
| ATAGTA          | 53       | 4.13        | 0.000018001        | 0.006118386        | 35       |
| ATCACGG         | 6        | 4.13        | 0.000018487        | 0.006235238        | 6        |
| GTCGGTCA        | 3        | 4.11        | 0.000020187        | 0.006705449        | 3        |
| AGTAGTAG        | 8        | 4.10        | 0.000020238        | 0.006622055        | 5        |
| AGTAAATA        | 13       | 4.09        | 0.000021394        | 0.006948454        | 12       |
| AACATGGC        | 4        | 4.07        | 0.000023052        | 0.007431897        | 4        |
| AGGCAAGG        | 3        | 4.06        | 0.000024095        | 0.007711455        | 3        |
| CAATGGGG        | 3        | 4.06        | 0.000024095        | 0.007655575        | 3        |
| GAGGTCCC        | 2        | 4.06        | 0.000024111        | 0.007605546        | 2        |
| GCTGTAGA        | 3        | 4.05        | 0.000025091        | 0.007858143        | 3        |
| CGCTACTA        | 2        | 4.03        | 0.000028453        | 0.008847874        | 2        |
| GCCCTACA        | 2        | 4.03        | 0.000028453        | 0.008785565        | 2        |
| AACCGTAG        | 3        | 4.02        | 0.000028608        | 0.008771653        | 3        |
| ATGTGACC        | 4        | 4.02        | 0.000028789        | 0.008765851        | 4        |
| TCGAGGAA        | 5        | 4.01        | 0.00002986         | 0.008967408        | 5        |
| CCTTTGTC        | 5        | 4.00        | 0.000031049        | 0.009261051        | 5        |
| GTACATCA        | 4        | 4.00        | 0.000031114        | 0.009217733        | 3        |
| GTAGAGAC        | 4        | 4.00        | 0.000032077        | 0.009439249        | 4        |
| GTGTGGTA        | 4        | 3.99        | 0.000033067        | 0.009665705        | 4        |
| TCGCGTAA        | 2        | 3.99        | 0.000033409        | 0.009701           | 2        |
| TACCGACA        | 3        | 3.98        | 0.000033797        | 0.0097491          | 3        |
| ATCTCAC         | 14       | 3.98        | 0.000034653        | 0.009930689        | 13       |

Table S3. 3-8mer words overrepresented in the 71 phytohormone gene promoters (500 bp).

|          |     |      |             |             |    |
|----------|-----|------|-------------|-------------|----|
| GTAAGAAA | 13  | 3.96 | 0.000037424 | 0.010451546 | 10 |
| ATAGCGC  | 3   | 3.95 | 0.000038407 | 0.010658186 | 3  |
| ATGAGGGG | 2   | 3.95 | 0.000039042 | 0.010766261 | 2  |
| ATAATAAT | 35  | 3.95 | 0.000039344 | 0.010781731 | 22 |
| ACATGG   | 27  | 3.94 | 0.000040941 | 0.011149684 | 24 |
| CAACCGTA | 3   | 3.94 | 0.000041298 | 0.011177482 | 3  |
| AATAAAA  | 97  | 3.93 | 0.000041863 | 0.01126089  | 53 |
| ATGGGGGA | 3   | 3.93 | 0.00004301  | 0.011498881 | 3  |
| TAATAA   | 132 | 3.92 | 0.000043692 | 0.011610421 | 55 |
| CGTATACG | 4   | 3.89 | 0.000049809 | 0.013156177 | 2  |
| ACTAT    | 137 | 3.88 | 0.000051655 | 0.013562067 | 58 |
| TCTCCCA  | 4   | 3.88 | 0.000052039 | 0.013581559 | 3  |
| ACGAATAG | 4   | 3.88 | 0.000052497 | 0.01362002  | 4  |
| AGAATCAC | 6   | 3.87 | 0.000054375 | 0.014024272 | 6  |
| TAGAGAGA | 15  | 3.87 | 0.000054818 | 0.014055848 | 10 |
| ATCACG   | 20  | 3.87 | 0.000054976 | 0.014014405 | 14 |
| CGTGCATC | 2   | 3.86 | 0.000057499 | 0.014324438 | 2  |
| GGTTGCTA | 3   | 3.84 | 0.000060603 | 0.015012425 | 3  |
| GAGAGAC  | 18  | 3.82 | 0.000065656 | 0.01617277  | 14 |
| ACTATGAC | 4   | 3.82 | 0.000068079 | 0.016675932 | 4  |
| ATATGTA  | 31  | 3.81 | 0.000068873 | 0.016776698 | 20 |
| GGGCTCGA | 2   | 3.81 | 0.000069704 | 0.016885313 | 2  |
| CTCCAGCC | 2   | 3.81 | 0.000069704 | 0.016792536 | 2  |
| TAGTAATA | 11  | 3.79 | 0.000074158 | 0.017767933 | 10 |
| ATAATAA  | 63  | 3.79 | 0.000074552 | 0.017765255 | 33 |
| AGGCTCAC | 2   | 3.78 | 0.000079771 | 0.018906158 | 2  |
| CATGTGAC | 5   | 3.77 | 0.000080199 | 0.018905405 | 5  |
| CGAGGCA  | 4   | 3.76 | 0.000083434 | 0.019562819 | 4  |
| ACCAGCTC | 3   | 3.76 | 0.000083446 | 0.01946156  | 3  |
| ACAAAGGA | 8   | 3.76 | 0.000085341 | 0.019798209 | 8  |
| CCAGGATC | 2   | 3.76 | 0.0000864   | 0.019938392 | 2  |
| CGGTCAC  | 5   | 3.76 | 0.000086586 | 0.0198767   | 5  |
| AACAACGC | 3   | 3.75 | 0.000086672 | 0.019792815 | 3  |
| CCTGCTTC | 3   | 3.75 | 0.000086672 | 0.019690262 | 3  |
| AGAGGCAA | 5   | 3.74 | 0.000092196 | 0.020624622 | 4  |
| ATTATTA  | 59  | 3.72 | 0.000099664 | 0.02218207  | 34 |
| CCCCCAC  | 5   | 3.72 | 0.00010119  | 0.022407963 | 5  |
| CTACCGAC | 2   | 3.71 | 0.00010335  | 0.022771277 | 2  |
| GCGTTGTA | 2   | 3.71 | 0.00010335  | 0.022657421 | 2  |
| CATTACAA | 9   | 3.71 | 0.00010337  | 0.02254906  | 8  |
| CCCTTGCC | 2   | 3.70 | 0.00010589  | 0.02298442  | 2  |
| TCCTCGAA | 4   | 3.68 | 0.00011661  | 0.025186611 | 4  |
| ACGCTACT | 2   | 3.67 | 0.00011969  | 0.025725136 | 2  |
| ACATCATA | 7   | 3.67 | 0.00012116  | 0.025914055 | 6  |
| ACATG    | 118 | 3.67 | 0.00012259  | 0.026092627 | 54 |
| AGGACAAA | 7   | 3.66 | 0.0001264   | 0.026773596 | 7  |
| ATAAAAT  | 69  | 3.66 | 0.00012811  | 0.027005342 | 43 |
| ATCTCACG | 4   | 3.65 | 0.00012887  | 0.027035569 | 4  |
| ATACATA  | 30  | 3.65 | 0.00013125  | 0.02740375  | 21 |

Table S3. 3-8mer words overrepresented in the 71 phytohormone gene promoters (500 bp).

|          |     |      |            |             |    |
|----------|-----|------|------------|-------------|----|
| ACTTGAGC | 4   | 3.65 | 0.00013232 | 0.027496221 | 4  |
| ACCACGG  | 4   | 3.65 | 0.00013285 | 0.027476137 | 4  |
| ATGCCCAT | 3   | 3.64 | 0.00013762 | 0.028196666 | 3  |
| TAGGGTCA | 3   | 3.62 | 0.00014502 | 0.029574637 | 3  |
| GTAAATAA | 14  | 3.62 | 0.00014697 | 0.029833549 | 12 |
| AAAATAAA | 58  | 3.62 | 0.00014885 | 0.030075931 | 33 |
| TAATAGTA | 10  | 3.62 | 0.00014898 | 0.029964115 | 9  |
| AAGTAGTA | 7   | 3.61 | 0.000154   | 0.0306922   | 7  |
| TACTA    | 131 | 3.61 | 0.00015527 | 0.030805287 | 57 |
| GGCCGCC  | 3   | 3.60 | 0.00016029 | 0.031657997 | 3  |
| GGGGAC   | 10  | 3.59 | 0.00016313 | 0.03207443  | 9  |
| AGACTATA | 6   | 3.59 | 0.00016467 | 0.032232682 | 6  |
| ATGCTCC  | 6   | 3.59 | 0.00016527 | 0.032206349 | 5  |
| CTCTGCCC | 2   | 3.59 | 0.00016675 | 0.032350976 | 2  |
| CCGCTGAA | 2   | 3.59 | 0.00016675 | 0.03220846  | 2  |
| GACATGCA | 4   | 3.58 | 0.00017128 | 0.03279451  | 3  |
| ACGAATA  | 13  | 3.57 | 0.00017553 | 0.033462123 | 12 |
| GACGGACA | 2   | 3.57 | 0.00017793 | 0.033772809 | 2  |
| GTCCTTAA | 4   | 3.56 | 0.00018526 | 0.035012543 | 4  |
| AATCACGG | 3   | 3.56 | 0.00018566 | 0.034937547 | 3  |
| AGATACGG | 3   | 3.56 | 0.00018683 | 0.035007471 | 3  |
| AGTGGGAC | 3   | 3.56 | 0.00018683 | 0.034858503 | 3  |
| ATACCGCG | 2   | 3.55 | 0.00019141 | 0.035411658 | 2  |
| GGTAGAAA | 5   | 3.54 | 0.0001967  | 0.035202074 | 5  |
| GGTCCAC  | 3   | 3.54 | 0.00019687 | 0.035089277 | 3  |
| TCTGATAA | 7   | 3.54 | 0.0002011  | 0.0356981   | 6  |
| ATCGCGG  | 3   | 3.54 | 0.00020335 | 0.035951952 | 3  |
| TAGGAGAA | 6   | 3.53 | 0.00020523 | 0.036138613 | 6  |
| ACCATTAC | 5   | 3.53 | 0.00020523 | 0.035994058 | 4  |
| TCGTGGCA | 2   | 3.53 | 0.00020808 | 0.036348509 | 2  |
| ATGCTCCC | 2   | 3.53 | 0.00020808 | 0.036204269 | 2  |
| CTATACCA | 4   | 3.53 | 0.00020836 | 0.036109694 | 4  |
| AGAGACAT | 7   | 3.53 | 0.00021014 | 0.036274797 | 7  |
| ATACA    | 163 | 3.52 | 0.00021318 | 0.036655256 | 63 |
| CTTACGC  | 5   | 3.52 | 0.00021496 | 0.036816938 | 4  |
| ATAAATAG | 13  | 3.52 | 0.00021654 | 0.036943241 | 10 |
| ACTATAA  | 22  | 3.52 | 0.00021841 | 0.036974536 | 21 |
| TACCCGTA | 2   | 3.51 | 0.0002211  | 0.037285964 | 2  |
| CGGCTTC  | 5   | 3.51 | 0.00022394 | 0.037620204 | 5  |
| GTGCTCAA | 3   | 3.51 | 0.00022805 | 0.038164429 | 3  |
| ATACTATC | 5   | 3.50 | 0.00022897 | 0.038172694 | 5  |
| CATATACG | 4   | 3.50 | 0.00022997 | 0.038050055 | 4  |
| AAGCCGTG | 2   | 3.50 | 0.00023151 | 0.038160855 | 2  |
| AACCGTAT | 4   | 3.50 | 0.00023282 | 0.038233055 | 3  |
| AGGGTCA  | 6   | 3.50 | 0.00023699 | 0.038772625 | 5  |
| GGCTAGGA | 2   | 3.49 | 0.0002455  | 0.040015587 | 2  |
| AGACAGGC | 2   | 3.49 | 0.0002455  | 0.039867381 | 2  |
| CTCGCACA | 2   | 3.49 | 0.0002455  | 0.039720269 | 2  |
| AACACGGA | 3   | 3.48 | 0.00025505 | 0.040813585 | 3  |

Table S3. 3-8mer words overrepresented in the 71 phytohormone gene promoters (500 bp).

|          |     |      |            |             |    |
|----------|-----|------|------------|-------------|----|
| AGACACCG | 2   | 3.47 | 0.0002569  | 0.040960136 | 2  |
| CAACTGGC | 2   | 3.47 | 0.0002569  | 0.04081173  | 2  |
| GTCCAC   | 6   | 3.47 | 0.00026365 | 0.041732844 | 5  |
| GTCCACAC | 3   | 3.46 | 0.00026732 | 0.042161557 | 3  |
| ACCACGGT | 2   | 3.46 | 0.00027489 | 0.042142752 | 2  |
| CGGTCA   | 14  | 3.45 | 0.00027961 | 0.042717004 | 13 |
| GGTAGAA  | 9   | 3.45 | 0.00028321 | 0.043116756 | 9  |
| CGTGGTAG | 2   | 3.45 | 0.00028437 | 0.043143554 | 2  |
| CCATTAC  | 11  | 3.45 | 0.00028548 | 0.043162607 | 10 |
| ATAAAA   | 182 | 3.44 | 0.00029068 | 0.043797784 | 67 |
| CCTGTCG  | 3   | 3.44 | 0.00029105 | 0.04370335  | 3  |
| ATACTTGA | 6   | 3.44 | 0.00029486 | 0.04412434  | 6  |
| ATTTTA   | 159 | 3.43 | 0.00029881 | 0.044563344 | 59 |
| AAGGACGG | 2   | 3.43 | 0.00030045 | 0.044656036 | 2  |
| ACCGACAG | 2   | 3.43 | 0.00030045 | 0.044505171 | 2  |
| ACAACGC  | 5   | 3.43 | 0.00030333 | 0.044780496 | 5  |
| AACGAATA | 7   | 3.41 | 0.00032429 | 0.047714159 | 6  |
| TAATAATA | 30  | 3.40 | 0.00033181 | 0.048495138 | 19 |
| CCGTCC   | 10  | 3.40 | 0.00033242 | 0.048422881 | 10 |
| AATTATAT | 22  | 3.40 | 0.00033707 | 0.048937653 | 17 |
| AAAATCTT | 19  | 3.40 | 0.00034273 | 0.049269966 | 16 |
| CCTTGCAG | 2   | 3.39 | 0.00034599 | 0.04957607  | 2  |
| ACACGCTA | 2   | 3.39 | 0.00034599 | 0.049414585 | 2  |
| ACACCGAG | 2   | 3.39 | 0.00034599 | 0.049254148 | 2  |
| CGAGGCAA | 2   | 3.39 | 0.00034599 | 0.049094749 | 2  |
| CGGTTGAC | 2   | 3.39 | 0.00034599 | 0.048936379 | 2  |
| AGTCCTCG | 2   | 3.39 | 0.00034599 | 0.048779027 | 2  |
| ATATGAAC | 7   | 3.39 | 0.00034781 | 0.048878453 | 6  |
