# Supplementary material
Source: PubMed Central journal article supplement (PMC2553831)

Michael et al. Figure S1

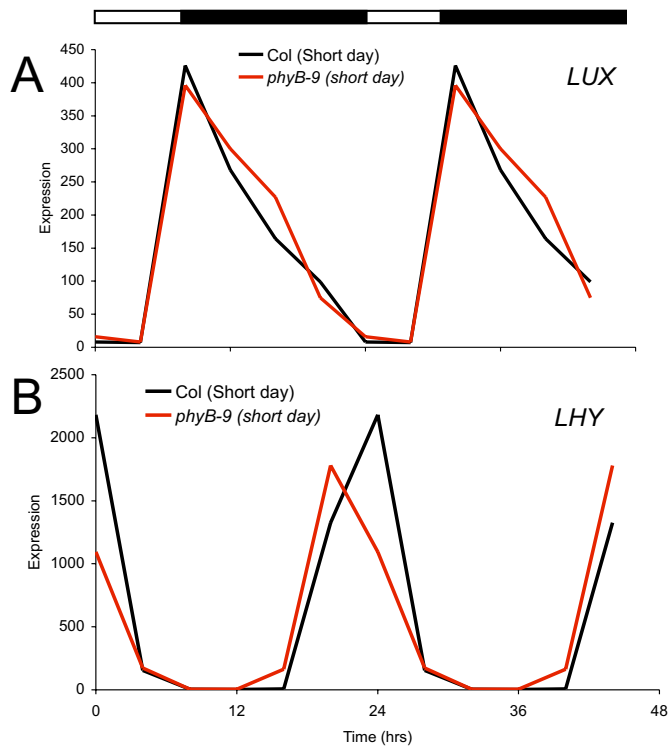

Supplement: pbio.0060225.sg001.pdf [file pbio.0060225.sg001.pdf]

Michael et al. Figure S2

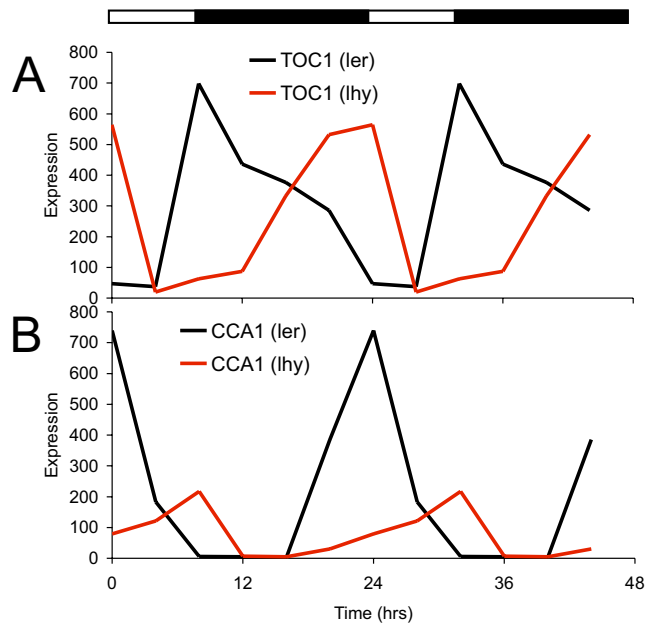

Supplement: pbio.0060225.sg002.pdf [file pbio.0060225.sg002.pdf]

Michael et al., Figure S3

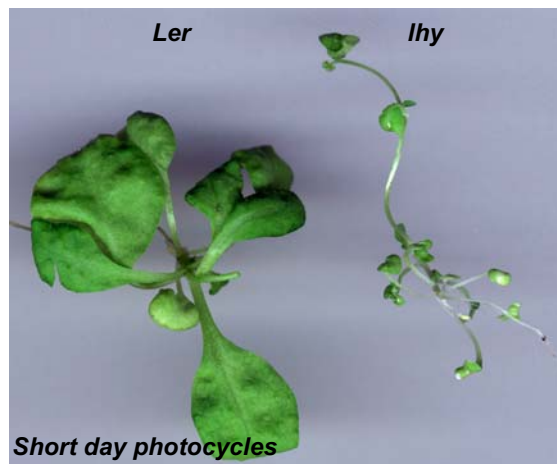

Supplement: pbio.0060225.sg003.pdf [file pbio.0060225.sg003.pdf]
